# Supplementary material for: Prevalence of overweight/obesity among the adult population in Ethiopia: a systematic review and meta-analysis
Source: PubMed Central journal article supplement — BMJ Open. 2020 Aug 6;10(8):e039200. doi: 10.1136/bmjopen-2020-039200 (PMC7412611; doi:10.1136/bmjopen-2020-039200), 2020-08-06
Supplement: bmjopen-2020-039200.draft_revisions.pdf [file bmjopen-2020-039200.draft_revisions.pdf]

# BMJ Open

BMJ Open is committed to open peer review. As part of this commitment we make the peer review history of every article we publish publicly available.

When an article is published we post the peer reviewers' comments and the authors' responses online. We also post the versions of the paper that were used during peer review. These are the versions that the peer review comments apply to.

The versions of the paper that follow are the versions that were submitted during the peer review process. They are not the versions of record or the final published versions. They should not be cited or distributed as the published version of this manuscript.

BMJ Open is an open access journal and the full, final, typeset and author-corrected version of record of the manuscript is available on our site with no access controls, subscription charges or pay-per-view fees (<http://bmjopen.bmj.com>).

If you have any questions on BMJ Open's open peer review process please email [info.bmjopen@bmj.com](mailto:info.bmjopen@bmj.com)

# BMJ Open

## Prevalence of overweight and obesity among adults in Ethiopia: A systematic review and meta-analysis

|                               |                                                                                                                                                                                        |
|-------------------------------|----------------------------------------------------------------------------------------------------------------------------------------------------------------------------------------|
| Journal:                      | <i>BMJ Open</i>                                                                                                                                                                        |
| Manuscript ID                 | bmjopen-2020-039200                                                                                                                                                                    |
| Article Type:                 | Original research                                                                                                                                                                      |
| Date Submitted by the Author: | 13-Apr-2020                                                                                                                                                                            |
| Complete List of Authors:     | Kassie, Ayelign; Woldia University, Nursing; Abate, Biruk; Woldia University, Nursing; Woldia University, Nursing Wudu, Mesfin; Woldia University, Nursing; Woldia University, Nursing |
| Keywords:                     | NUTRITION & DIETETICS, PUBLIC HEALTH, Nutritional support < GASTROENTEROLOGY                                                                                                           |
|                               |                                                                                                                                                                                        |

SCHOLARONE™  
Manuscripts

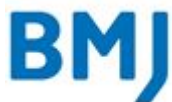

I, the Submitting Author has the right to grant and does grant on behalf of all authors of the Work (as defined in the below author licence), an exclusive licence and/or a non-exclusive licence for contributions from authors who are: i) UK Crown employees; ii) where BMJ has agreed a CC-BY licence shall apply, and/or iii) in accordance with the terms applicable for US Federal Government officers or employees acting as part of their official duties; on a worldwide, perpetual, irrevocable, royalty-free basis to BMJ Publishing Group Ltd ("BMJ") its licensees and where the relevant Journal is co-owned by BMJ to the co-owners of the Journal, to publish the Work in this journal and any other BMJ products and to exploit all rights, as set out in our [licence](#).

The Submitting Author accepts and understands that any supply made under these terms is made by BMJ to the Submitting Author unless you are acting as an employee on behalf of your employer or a postgraduate student of an affiliated institution which is paying any applicable article publishing charge ("APC") for Open Access articles. Where the Submitting Author wishes to make the Work available on an Open Access basis (and intends to pay the relevant APC), the terms of reuse of such Open Access shall be governed by a Creative Commons licence – details of these licences and which [Creative Commons](#) licence will apply to this Work are set out in our licence referred to above.

Other than as permitted in any relevant BMJ Author's Self Archiving Policies, I confirm this Work has not been accepted for publication elsewhere, is not being considered for publication elsewhere and does not duplicate material already published. I confirm all authors consent to publication of this Work and authorise the granting of this licence.

# Prevalence of overweight and obesity among adults in Ethiopia: A systematic review and meta-analysis

Ayalign Mengesha<sup>1\*</sup>, Biruk Beletew<sup>2</sup>, Mesfin Wudu<sup>3</sup>

## **Author details:**

### **1\*Ayalign Mengesha (MSc in adult health nursing)**

<sup>1</sup>Woldia University, College of Health Sciences, Department of Nursing, P.O.Box 400 Woldia, Ethiopia:

*E-mail:* [Ayalignmengesha59@gmail.com](mailto:Ayalignmengesha59@gmail.com); *Tel:* +251937384459

### **2Biruk Beletew (MSc in pediatrics & child health nursing)**

<sup>2</sup>Woldia University, College of Health Sciences, Department of Nursing, P.O.Box 400 Woldia, Ethiopia:

*E-mail:* [birukkelemb@gmail.com](mailto:birukkelemb@gmail.com); *Tel:* +251922898070

### **3Mesfin Wudu (MSc in pediatrics & child health nursing)**

<sup>3</sup>Woldia University, College of Health Sciences, Department of Nursing, P.O.Box 400 Woldia, Ethiopia:

*E-mail:* [mesfine12a@gmail.com](mailto:mesfine12a@gmail.com); *Tel:* +251962649062

## **Abstract**

**Background:** Overweight and obesity are emerging public health problems in developing countries including Ethiopia. Despite the presence of multiple studies, primary study findings on the prevalence of overweight and obesity in Ethiopia are inconsistent. Therefore, this study aimed to estimate the pooled prevalence of overweight and obesity among adults in Ethiopia.

**Methods:** PubMed, Scopus, Cochrane Library, and Google Scholar were searched for studies that looked at overweight and obesity among adults. The Cochran's Q chi-square and the I<sup>2</sup> test statistics were used to check heterogeneity among the studies. The funnel plot and Egger's regression tests were also used to assess the presence of publication bias. A weighted inverse variance random-effects model was applied to estimate the pooled national prevalence of overweight and obesity with a 95% confidence interval across the studies. Subgroup analysis was

1 performed by residence, study setting, sample size, and year of study. Sensitivity analysis was  
2 also conducted to assess the effect of a single study on the pooled estimates. Data analysis was  
3 done using STATA™ Version 14 software.  
4  
5  
6  
7

8  
9 **Results:** In this systematic review and meta-analysis, a total of 16 studies with 19,527 study  
10 participants were included to estimate the pooled prevalence of overweight and obesity among  
11 adults. Among these studies, 14 were used to estimate the pooled prevalence of overweight, and  
12 all the 16 studies were used to estimate the pooled prevalence of obesity. The estimated pooled  
13 prevalence of overweight among adults in Ethiopia was 20.4%, and after adjustment for  
14 publication bias with the trim and fill analysis the estimated prevalence rate was changed to 19%.  
15 Besides, the estimated pooled prevalence of obesity was 5.4%. The prevalence rate of  
16 overweight and obesity was different from rural to urban and from time to time with an  
17 increasing fashion.  
18  
19  
20  
21  
22  
23  
24  
25  
26  
27  
28  
29

30 **Conclusion:** The prevalence of overweight and obesity is increasing in Ethiopia compared to  
31 previous studies. This needs large scale awareness creation campaigns and situation-based and  
32 context-specific prevention strategies.  
33  
34  
35  
36

37 **Keywords:** Adult; Ethiopia; Obesity; Overweight  
38  
39

## 40 **Strength and limitation of the study**

- 41  
42  
43 ❖ **Strength:** The study has used a pre-specified protocol for search strategy and data  
44 abstraction and used internationally accepted tools for a critical appraisal system for quality  
45 assessment of individual studies.  
46  
47  
48
- 49  
50 ❖ **Limitations:** It is difficult to determine if the results from various regions are  
51 representative of the entire country, as no data were found for all region of the country.  
52  
53  
54  
55  
56  
57

## Introduction

Overnutrition is becoming a major global health problem. It includes, overweight, obesity and diet-related non-communicable diseases (1). Overweight and obesity are used to refer an abnormal or excessive fat accumulation that can put people at greater risk and may impair their health (2). Obesity is considered an illness that necessitates immediate reversal to prevent early and untimely death among patients (3, 4).

Overweight and obesity affect all age groups of people both in developed and developing countries regardless of their socioeconomic status (1, 5). Since 1980; the prevalence of obesity has doubled in more than 70 countries and has continuously increased in most other countries (6).

In 2016, more than 1.9 billion adults were overweight worldwide. Of these, over 650 million were obese. Overweight accounted for 39% (39% of men and 40% of women), and obesity 13% (11% of men and 15% of women) in the same year (7).

The prevalence of overweight and obesity is escalating in developing countries, particularly among urban dwellers and wealthier people due to the influence of demographic, epidemiologic, and nutrition transitions (8). According to a study on the global trends of overweight and obesity, 26.9% of adults in Africa are overweight and obese (9).

Overweight and obesity in adults are associated which increased risk of diabetes, hypertension, and other chronic diseases. In addition to these chronic diseases, overweight and obesity in women increases the risk of cesarean section delivery, postpartum hemorrhage, high birth weight babies, and infant overweight and obesity (1, 10).

1  
2 Most of the world's population live in countries where overweight and obesity kills more  
3  
4 people than underweight (11). In 2015, high body mass index (BMI) had caused an estimated 4  
5  
6 million deaths globally, and nearly 40% of these deaths occurred in persons who were  
7  
8 overweight but not obese. More than two-thirds of deaths related to high BMI were due to  
9  
10 cardiovascular diseases (6, 12). The latest WHO reports also showed that overweight and obesity  
11  
12 are becoming the leading causes of death worldwide (1, 13).  
13  
14  
15

16  
17 Overweight and obesity costs the world billions of dollars a year in lost opportunities for  
18  
19 economic growth and lost investments in human capital associated with increased preventable  
20  
21 morbidity and mortality rates in both children and adults (1, 14).  
22  
23

24  
25 Ethiopia is not different. According to the 2016 EDHS report, the proportion of  
26  
27 overweight and obesity among women has increased from 3% in 2000 to 8% in 2016. Similarly,  
28  
29 3% of men were overweight or obese (15).  
30  
31

32  
33 Overweight and obesity are associated with many factors including excessive  
34  
35 consumption of alcohol, cigarette smoking and sedentary lifestyle habits (16). Some studies have  
36  
37 also reported that the risk of overweight and obesity is increased with education in developing  
38  
39 countries (17, 18) and wealth (15, 19, 20).  
40  
41

42  
43 As a treatment, behavioral and pharmaceutical interventions are available and helpful in  
44  
45 getting weight loss. A reduction of 5% to 7% of body weight alone is associated with a lower  
46  
47 incidence of diabetes, hypertension and other cardiovascular diseases. Larger weight loss has  
48  
49 even been linked with better improvements in controlling the level of blood glucose and lipids in  
50  
51 limited surgical outcomes data (21).  
52  
53  
54  
55  
56  
57  
58  
59  
60

1  
2 Therefore, knowing the prevalence of overweight and obesity is paramount to design  
3  
4 preventive strategies. However, primary studies on the prevalence of overweight and obesity in  
5  
6 Ethiopia are inconclusive. Hence, this systematic review and meta-analysis aimed to determine  
7  
8 the pooled prevalence of overweight and obesity among adults in Ethiopia.  
9

## 10 11 12 **Methods**

### 13 14 **Literature search strategy**

15  
16 Firstly, The Cochrane Library, Joanna Briggs Institute (JBI) and PROSPERO databases  
17  
18 were searched to check whether a systematic review and meta-analysis studies exist or for the  
19  
20 presence of ongoing projects related to overweight and obesity in Ethiopia. The necessary  
21  
22 articles were searched using PubMed, Scopus, Google scholar, and African journals online.  
23  
24

25  
26 For this study relevant articles were identified using the following terms: “overweight”,  
27  
28 “obesity”, “nutrition”, “malnutrition”, “undernutrition”, “over nutrition”, “adults”, “elders”,  
29  
30 “geriatrics” “Ethiopia”. The key terms were used in combination using Boolean operators like  
31  
32 “OR” or “AND”. The searches were restricted to full texts, free articles, human studies, and  
33  
34 English language publications. This search involved articles published from January 1<sup>st</sup>, 2010 to  
35  
36 March 10<sup>th</sup>, 2020. Grey literatures like surveillance report, academic dissertations, and  
37  
38 conference abstracts were also examined and included when they deemed low risk.  
39  
40  
41

42  
43 Besides, the reference lists of included articles in this systematic review and meta-  
44  
45 analysis were hand-searched to identify any relevant additional articles. PubMed search strategy:  
46  
47 (((((((((overweight) OR obesity) OR nutrition) OR malnutrition) OR over nutrition) OR  
48  
49 undernutrition) AND Adults) OR Elders) OR Geriatrics) AND Ethiopia)))))))).  
50  
51  
52  
53  
54  
55  
56  
57



## Eligibility criteria

Studies were included in this systematic review and meta-analysis if they followed the following guidelines: (1) all observational study designs (cross-sectional, case-control, and cohort studies) which reported the prevalence of overweight and obesity or one of them; (2) published from 2010 to 2020; (3) published in English language; (4) abstract and, or full text available for this review; and (5) conducted in Ethiopia. Studies were excluded if they: (1) possessed a poor quality score as per the stated criteria; (2) failed to determine the desired outcomes (overweight and obesity); and (3) included children and adolescents.

## Outcomes of interest

The main outcomes of interest were the prevalence of overweight and obesity reported in the original papers either as a percentage or as the number of cases (n) / total number of study participants (N). These two parameters were necessary to calculate the pooled prevalence of overweight and obesity in the meta-analysis. Therefore, the prevalence rate was calculated by dividing the number of individuals who were overweight and, or obese to the total number of study participants (sample size) multiplied by 100.

The outcome variables of interest were categorized as follows based on the WHO Classification of body mass index; overweight if the BMI is 25.0-29.9kg/m<sup>2</sup> and obese if it is  $\geq 30.0$ kg/m<sup>2</sup> for the study participants of the included studies in the systematic review and meta-analysis (22).

## Data extraction

The authors developed a data extraction form on the excel sheet which includes the author name, year of publication, study setting, study design, sex of participants, sample size, and the prevalence of overweight and obesity. The data extraction sheet was piloted using 5

1 papers randomly. The extraction form was adjusted after having a piloted template. Two of the  
2 authors independently extracted all the necessary data from each study using the data extraction  
3 format. The third author checked the correctness of the data independently. Any disagreements  
4 between authors who extracted the data were resolved through discussions with the third  
5 reviewer and fourth reviewer when required. For articles that did not provide details of their  
6 study background, corresponding authors were contacted through e-mail and asked for the  
7 relevant information, such as study time, region, or others.

### 18 **Quality assessment**

20 Two independent authors assessed the methodological quality of all of the potential  
21 studies to be included in the analysis. Any disagreements between the authors were resolved  
22 through discussion or, if consensus could not be reached, consultation with a third independent  
23 author was considered. The quality of each included study was assessed using the JBI quality  
24 appraisal checklist for cross-sectional studies (23). Because the articles included in this study  
25 were all cross-sectional. Studies were considered low risk when scored 50% and above of the JBI  
26 quality assessment indicators.

### 37 **Statistical analysis**

39 To obtain the pooled prevalence of overweight and obesity, a meta-analysis using the  
40 random-effects model was performed due to the presence of heterogeneity (24). Cochran's Q  
41 chi-square statistic and the I<sup>2</sup> tests were run to assess the random variations between primary  
42 studies (25). In this study, heterogeneity was interpreted as an I<sup>2</sup> value of 0% = no heterogeneity,  
43 ≤ 25% = low, 25%-50% = moderate, and ≥ 75% = high (25). In the case of high heterogeneity,  
44 subgroup and sensitivity analyses were run to identify possible moderators for the heterogeneity.  
45 Potential publication bias was assessed by visually inspecting funnel plots and objectively using

1 the Egger's bias test (26). The trim and fill analysis was done to assess for any publication bias  
2 based on the assumption that the effect sizes of all the studies are normally distributed around the  
3 center of a funnel plot in the absence of publication bias. The meta-analysis was performed using  
4 the STATA™ Version 14 software (27). Finally, for all analysis, a p-value of less than 0.05 was  
5 considered to declare statistically significant values.  
6  
7  
8  
9  
10  
11  
12  
13

## 14 **Presentation and reporting of results**

15  
16 The results of this systematic review and meta-analysis were reported based on the  
17 Preferred Reporting Items for Systematic Review and Meta-Analysis statement (PRISMA)  
18 guideline (Supplementary file-PRISMA checklist) (28). The entire process of study screening,  
19 selection, and inclusion are shown with the support of a flow diagram. Moreover, tables and  
20 narrative summaries are used to report the risk of bias for every eligible study.  
21  
22  
23  
24  
25  
26  
27  
28

## 29 **Results**

### 30 **Search results**

31  
32 In the first step of article searches, 825 studies that were published from 2010-2020 were  
33 retrieved through database searching from five international databases. Three studies were  
34 retrieved through manual search from Grey literatures. Of these studies, 135 duplicate records  
35 were identified and after duplication removal, a total of 690 articles remained. Finally, 22 studies  
36 were screened for full-text review and, 16 articles (n = 19,527 participants) were selected to  
37 estimate the pooled prevalence of overweight and obesity among adults in Ethiopia. The detailed  
38 steps in the screening process are shown in the PRISMA flow chart of the study selection (Fig 1).  
39  
40  
41  
42  
43  
44  
45  
46  
47  
48  
49  
50  
51  
52  
53  
54  
55  
56  
57  
58  
59  
60

## Baseline characteristics of included studies

In the current meta-analysis, a total of 16 studies with 19,527 study participants were included to estimate the pooled prevalence of overweight and obesity among adults in Ethiopia. Among these studies, 14 had reported the prevalence of both overweight and obesity and 2 studies had reported the prevalence of obesity only. Concerning the study design, all of the studies included were cross-sectional. The studies included in this systematic review and meta-analysis varied substantially in sample size ranging from 68 to 6,602.

Overall information regarding the prevalence of overweight and obesity among adults was obtained from various regions in the country. Six of the studies involved participants from Amhara (23-28), four from SNNPR (29-32), one from Oromia (33), one from Somali (34), one from Tigray (35), one from Addis Ababa (36) and two studies involving participants from different regions (37, 38).

Regarding sampling, all of the studies had used the probability sampling technique. The quality score of each primary study, based on the JBI quality appraisal criteria showed no considerable risk; hence, all the studies were included in this systematic review and meta-analysis (**Supplementary Table 1**).

## The pooled prevalence of overweight among adults in Ethiopia

Fourteen studies (n=14) had reported the prevalence of overweight among adults in different regions of Ethiopia (Supplementary Table 1). The prevalence of overweight reported in the country ranges from 4.7% (33) to 40.1% (32). The random-effects model analysis from those studies revealed that in this meta-analysis, the estimated pooled prevalence of overweight among adults in Ethiopia was 20.44% (95% CI: 16.69, 24.19) with a significant level of heterogeneity among the studies ( $I^2 = 97.6\%$ ;  $p \leq 0.001$ ) (Fig 2).

## The pooled prevalence of obesity among adults in Ethiopia

Besides overweight, sixteen studies (n=16) had reported the prevalence of obesity among adults in different parts of the country (Supplementary Table 1). The prevalence of obesity reported in the country ranges from 1.6% (33) to 16.2% (25). In this meta-analysis, the estimated pooled prevalence of obesity among adults was 5.44% (95% CI: 4.37, 6.51) with a significant level of heterogeneity among the studies in the random-effects model analysis ( $I^2 = 93.3\%$ ,  $p \leq 0.001$ ) (Fig 3).

### Subgroup analysis

There was a significant level of heterogeneity among the primary studies included in this systematic review and meta-analysis. Thus, a subgroup analysis was conducted through stratification using study year, residence, study setting, and sample size to identify the sources of heterogeneity for the pooled prevalence of overweight and obesity among adults.

In the subgroup analysis, the prevalence of overweight was found to be 22.55% in studies published since 2015, 22.43% in studies conducted only in urban settings, 20.44% in institution-based settings and 24.39% in studies with a sample size of less than or equal to 384 participants.

Similarly, the prevalence of obesity was found to be 6.90% in studies published since 2015, 6.23% in studies conducted only in urban settings, 6.41% in institution-based settings and 9.61% in studies with a sample size of less than or equal to 384 participants (**Table 1**).

**Table 1:** Prevalence of overweight and obesity in Ethiopia after subgroup analysis by characteristics of the studies included.

| Subgroup             | No. of studies | Overweight (95%CI) | I <sup>2</sup> and P-value | No. of studies | Obesity (95%CI)  | I <sup>2</sup> and P-value |
|----------------------|----------------|--------------------|----------------------------|----------------|------------------|----------------------------|
| <b>Year of study</b> |                |                    |                            |                |                  |                            |
| Before 2015          | 6              | 17.49(12.17,22.81) | (96.5%, p≤0.001)           | 7              | 3.74(2.73,4.75)  | (82.3%, p≤0.001)           |
| After 2015           | 8              | 22.55(16.57,28.54) | (98.2%, p≤0.001)           | 9              | 6.90(4.89,8.92)  | (95.8%, p≤0.001)           |
| <b>Residence</b>     |                |                    |                            |                |                  |                            |
| Urban                | 12             | 22.43(17.76,27.10) | (97.4%, p≤0.001)           | 14             | 6.23(4.92,7.54)  | (92.6%, p≤0.001)           |
| Rural                | -              | -                  | -                          | -              | -                | -                          |
| Both                 | 2              | 10.15(8.70,11.61)  | (60.5%, p≥0.05)            | 2              | 1.93(1.54,2.32)  | (0.0%, p≥0.05)             |
| <b>Setting</b>       |                |                    |                            |                |                  |                            |
| Community based      | 9              | 19.46(15.93,23.00) | (95.8%, p≤0.001)           | 10             | 5.13(3.90,6.35)  | (92.9%, p≤0.001)           |
| Institution based    | 5              | 20.44(16.69,24.19) | (98.9%, p≤0.001)           | 6              | 6.41(3.79,9.03)  | (94.8%, p≤0.001)           |
| <b>Sample size</b>   |                |                    |                            |                |                  |                            |
| <384                 | 4              | 24.39(6.71,42.08)  | (98.7%, p≤0.001)           | 5              | 9.61(3.94,15.28) | (94.8%, p≤0.001)           |
| >384                 | 10             | 19.34(15.59,23.09) | (97.4%, p≤0.001)           | 11             | 4.55(3.54,5.55)  | (92.5%, p≤0.001)           |

### Sensitivity analysis for the prevalence of overweight

To evaluate the effect of individual studies on the pooled prevalence of overweight among adults in Ethiopia, a sensitivity analysis was performed using the random-effects model. The results from the sensitivity analysis had revealed that a single study had not influenced the pooled estimated prevalence of overweight among adults. The pooled estimated prevalence of overweight varied between 18.92 (15.39, 22.44) (32) and 21.69 (17.89, 25.48) (33) after the deletion of a single study (Fig 4).

### Sensitivity analysis for the studies included in obesity

To check the effect of individual studies on the pooled prevalence of obesity in Ethiopia, a sensitivity analysis was performed using the random-effects model and the results had revealed that there was no influential study on the pooled estimated prevalence of obesity among adults. The pooled estimated prevalence of obesity ranged from 4.98 (3.97, 5.99) (32) and 5.83 (4.64, 7.03) (31) after the deletion of a single study (Fig 5).

## Publication bias

There was a publication bias among the included studies in both overweight and obesity as illustrated by the asymmetrical distribution of funnel plot tests (Supplementary Fig 1 and 2 ). Similarly, the results of Egger's tests for the funnel plot were statistically significant for the presence of publication bias ( $P = 0.002$  for overweight and  $p \leq 0.001$  for obesity) respectively (Fig 6 and 7).

## Trim and fill analysis for the prevalence of overweight and obesity

To reduce and adjust publication bias in the studies, trim and fill analysis was performed to estimate the number of missing studies that might exist. After adjustment for publication bias, the estimated pooled prevalence of overweight among adults in Ethiopia was 19.02 (95% CI: 15.29, 22.74) with a significant level of heterogeneity among the studies ( $I^2 = 50.29\%$ ;  $p \leq 0.001$ ) (Fig 8).

Likewise, studies included in obesity estimation among adults in Ethiopia were adjusted with trim and fill analysis. After adjustment, the estimated pooled prevalence of obesity was found to be 5.44% (95% CI: 4.37, 6.51). This finding is similar with the unadjusted prevalence rate of obesity, but with different levels of heterogeneity among the studies in the random-effects model analysis ( $I^2 = 3.71\%$ ,  $p \leq 0.001$ ) (Fig 9).

## Discussion

This systematic review and meta-analysis were conducted to estimate the pooled prevalence of overweight and obesity among adults in Ethiopia. In this study, the estimated pooled prevalence of overweight among adults was 20.4%. However, due to the presence of publication bias, after adjustment with the trim and fill analysis, the estimated prevalence rate was changed to 19%. Besides, the estimated pooled prevalence of obesity among adults in

1 Ethiopia was 5.4%. This finding is higher than the 2011 and 2016 Ethiopian demographic and  
2 health survey reports indicating an increasing trend in overweight and obesity prevalence rates  
3  
4 (39). The result is in line with a meta-analysis in the Asian Pacific region which has reported that  
5  
6 the prevalence of over nutrition was estimated at 23% (40).  
7  
8  
9

10  
11 A consistent finding has been also reported from a study in Ghana that the national  
12 prevalence of overweight was estimated at 25.4%. However, obesity in the Ghanaian study was  
13  
14 significantly higher (17.1%) than the current study (41).  
15  
16  
17  
18

19 Similar to the Ghanaian study, a study in Iran has shown that the prevalence of obesity in  
20 adults of Iran was 21.4% based on a meta-analysis of studies in the country (42). Another meta-  
21  
22 analysis in Iran among military personnel has also indicated that the pooled prevalence of  
23  
24 overweight and obesity was 41% and 13% respectively, a significantly higher value than our  
25  
26 study finding (43).  
27  
28  
29  
30

31 These discrepancies might be due to differences in the study population, the  
32 developmental level of these countries, and the educational level of participants. One of the  
33  
34 Iranian studies was conducted among military personnel and may not be representative of the  
35  
36 national prevalence of overweight and obesity because the high prevalence rate may be  
37  
38 occupation-related (43). This might be also due to their capacity of purchasing more energy-  
39  
40 dense foods as witnessed from studies in both developed and developing countries that high-  
41  
42 income households purchased foods in bulk and were more likely to over-consume these foods  
43  
44 (44-46).  
45  
46  
47  
48  
49  
50

51 Likewise, the prevalence of overweight and obesity in Ethiopia is significantly lower than  
52  
53 a study in Spain that the estimated prevalence of overweight in the Spanish adult population was  
54  
55  
56  
57



1 39.3% and obesity was 21.6% (47). The Spanish result is in line with the WHO global report that  
2  
3 39% of adults aged 18 years and over were overweight in 2016, and 13% were obese (7).  
4  
5  
6

7 There was a significant level of heterogeneity among the primary studies included in this  
8  
9 systematic review and meta-analysis. Thus, a subgroup analysis was conducted through  
10  
11 stratification using study year, residence, study setting, and sample size in order to identify the  
12  
13 sources of heterogeneity to the pooled prevalence of overweight and obesity. The prevalence of  
14  
15 overweight was found to be higher in some groups; 22.55% in studies conducted since 2015,  
16  
17 22.43% in studies conducted only in urban settings, 20.44% in institution-based settings and  
18  
19 24.39% in studies with a sample size of less than or equal to 384 participants. This indicates that  
20  
21 overweight is in an increasing trend among adults in Ethiopia compared to previous studies (39).  
22  
23  
24  
25

26 Besides, the prevalence of obesity was found to be 6.90% in studies conducted since  
27  
28 2015, 6.23% in studies conducted only in urban settings, 6.41% in institution-based settings and  
29  
30 9.61% in studies with a sample size of less than or equal to 384 participants. This means the  
31  
32 prevalence of overweight and obesity is increasing from time to time especially among urban  
33  
34 residents. The finding is in line with the Ghanaian study which has reported a higher prevalence  
35  
36 of overweight (27.2% in urban and 16.7% in rural), and obesity (20.6% in urban and 8.0% in  
37  
38 rural settings) among urban than rural residents (41). Similar findings have been reported from  
39  
40 other studies (18, 39, 48).  
41  
42  
43  
44

45 This finding might be due to the rapid demographic, epidemiologic, and nutrition  
46  
47 transitions in Ethiopia because urbanization and a shift in nutritional habits are the major known  
48  
49 factors which predispose people to overweight and obesity (8). The other reason could be due to  
50  
51 differences in lifestyle of urban dwellers as compared to the rural residents. Unlike rural  
52  
53 residents who are usually more actively involved in a less sedentary lifestyle and more laborious  
54  
55  
56  
57

1 activities, the occupation of urban dwellers may result in sedentary type lifestyles among adults  
2  
3  
4 (49-51).  
5

## 6 7 **Conclusion**

8  
9  
10 This study revealed that the prevalence of overweight and obesity is increasing in  
11 Ethiopia compared to previous studies. The prevalence rate of overweight and obesity is different  
12 from rural to urban and time to time with an increasing fashion. Hence, large scale awareness  
13 creation campaigns and situation-based and context-specific preventive strategies need to be  
14 designed to reduce the burden of overweight and obesity in the country. Moreover, this  
15 systematic review and meta-analysis may help policymakers and program managers to design  
16 strategies on the prevention methods of overweight and obesity among adults in Ethiopia.  
17  
18  
19  
20  
21  
22  
23  
24  
25

## 26 27 **Abbreviations**

28  
29 AOR: Adjusted Odds Ratio; BMI: Body mass index; CI: Confidence Interval; JBI:  
30 Joanna Briggs Institute; SNNPR: Southern Nations, Nationalities, and Peoples Region;  
31 PRISMA: Preferred Reporting Items for Systematic Reviews and Meta-Analyses.  
32  
33  
34  
35

## 36 37 **Declaration**

### 38 39 **Ethics approval and consent to participate**

40  
41 Not applicable.  
42

### 43 44 **Consent for publication**

45  
46 Not applicable.  
47

### 48 49 **Availability of data and materials**

50 The data used during this systematic review and meta-analysis is available within the  
51 article and the supporting file.  
52  
53  
54  
55  
56  
57

## Competing interest

The authors declare that no competing interests exist.

## Funding

Not applicable.

## Author's contribution

AM and BB developed the study protocol and were involved in the design, selection of study, data extraction, statistical analysis, and writing the initial drafts of the manuscript. MW was involved in data extraction, quality assessment, statistical analysis, and revising. AM and BB prepared and edited the final manuscript. All authors have read and approved the submission of the final version of the manuscript.

## References

1. Fanzo J, Hawkes C, Udomkesmalee E, Afshin A, Allemandi L, Assery O, et al. 2018 Global Nutrition Report: Shining a light to spur action on nutrition. 2018.
2. Doak C, Wijnhoven T, Schokker D, Visscher T, Seidell J. Age standardization in mapping adult overweight and obesity trends in the WHO European Region. *Obesity reviews*. 2012;13(2):174-91.
3. World Health Organization (WHO): Global Database on Body Mass Index. BMI Classification [Internet]. Geneva: WHO; 2004 [cited January 14, 2020].
4. Dobbs R, Sawers C, Thompson F, Manyika J, Woetzel J, Child P, et al. Overcoming obesity: An initial economic analysis. 2014. McKinsey & Company: [www.mckinsey.com/mgi](http://www.mckinsey.com/mgi). 2014:1-106.
5. Morgen CS, Sørensen TI. Obesity: global trends in the prevalence of overweight and obesity. *Nature Reviews Endocrinology*. 2014;10(9):513.

- 1  
2  
3  
4  
5  
6  
7  
8  
9  
10  
11  
12  
13  
14  
15  
16  
17  
18  
19  
20  
21  
22  
23  
24  
25  
26  
27  
28  
29  
30  
31  
32  
33  
34  
35  
36  
37  
38  
39  
40  
41  
42  
43  
44  
45  
46  
47  
48  
49  
50  
51  
52  
53  
54  
55  
56  
57  
58  
59  
60
6. Tabarés Seisdedos R. Health effects of overweight and obesity in 195 countries over 25 years. *New England Journal of Medicine*, 2017, vol 377, num 1, p 13-27. 2017.
7. World health organization: Overweight and obesity report fact sheet (accessed, Mar 3, 2020); available from:<https://www.who.int/news-room/fact-sheets/detail/obesity-and-overweight>.
8. Defo BK. Demographic, epidemiological, and health transitions: are they relevant to population health patterns in Africa? *Global health action*. 2014;7(1):22443.
9. Yatsuya H, Li Y, Hilawe EH, Ota A, Wang C, Chiang C, et al. Global trend in overweight and obesity and its association with cardiovascular disease incidence. *Circulation Journal*. 2014:CJ-14-0850.
10. Berrington de Gonzalez A, Hartge P, Cerhan JR, Flint AJ, Hannan L, MacInnis RJ, et al. Body-mass index and mortality among 1.46 million white adults. *New England Journal of Medicine*. 2010;363(23):2211-9.
11. Tobias DK, Hu FB. The association between BMI and mortality: implications for obesity prevention. *The Lancet Diabetes & Endocrinology*. 2018;6(12):916-7.
12. Bovet P, Chioloro A, Gedeon J. Health Effects of Overweight and Obesity in 195 Countries. *The New England journal of medicine*. 2017;377(15):1495-6.
13. World Health Organization: Obesity and overweight. Fact sheet number 311. World Health Organisation. 2014:5-1.
14. Bhurosy T, Jeewon R. Overweight and obesity epidemic in developing countries: a problem with diet, physical activity, or socioeconomic status? *The Scientific World Journal*. 2014;2014.

- 1  
2 15. Pengpid S, Peltzer K. Prevalence and correlates of underweight and overweight/obesity  
3 among women in India: results from the National Family Health Survey 2015–2016.  
4  
5  
6 Diabetes, metabolic syndrome and obesity: targets and therapy. 2019;12:647.  
7
- 8  
9 16. Sarma H, Saquib N, Hasan MM, Saquib J, Rahman AS, Khan JR, et al. Determinants of  
10  
11 overweight or obesity among ever-married adult women in Bangladesh. *BMC obesity*.  
12  
13 2016;3(1):13.  
14
- 15  
16 17. Benkeser R, Biritwum R, Hill A. Prevalence of overweight and obesity and perception of  
17  
18 healthy and desirable body size in urban, Ghanaian women. *Ghana medical journal*.  
19  
20 2012;46(2):66-75.  
21
- 22  
23 18. Diendéré J, Kaboré J, Somé JW, Tougri G, Zeba AN, Tinto H. Prevalence and factors  
24  
25 associated with overweight and obesity among rural and urban women in Burkina Faso. *The*  
26  
27 *Pan African Medical Journal*. 2019;34.  
28
- 29  
30 19. Hruschka DJ, Brewis AA. Absolute wealth and world region strongly predict overweight  
31  
32 among women (ages 18–49) in 360 populations across 36 developing countries. *Economics*  
33  
34 & *Human Biology*. 2013;11(3):337-44.  
35
- 36  
37 20. Bishwajit G. Household wealth status and overweight and obesity among adult women in B  
38  
39 angladesh and N epal. *Obesity science & practice*. 2017;3(2):185-92.  
40
- 41  
42 21. Force UPST. Screening and interventions for overweight and obesity in adults. Rockville,  
43  
44 MD: Agency for Healthcare Research and Quality. 2003.
- 45  
46 22. Alexander JW, Solomkin JS, Edwards MJ. Updated recommendations for control of surgical  
47  
48 site infection. *Ann Surg*. 2011; 253(6):1082-93.  
49
- 50  
51 23. Awoke A, Awoke T, Alemu S, Megabiaw B. Prevalence and associated factors of  
52  
53 hypertension among adults in Gondar, Northwest Ethiopia: a community based cross-  
54  
55 sectional study. *BMC cardiovascular disorders*. 2012;12(1):113.  
56  
57

- 1  
2  
3  
4  
5  
6  
7  
8  
9  
10  
11  
12  
13  
14  
15  
16  
17  
18  
19  
20  
21  
22  
23  
24  
25  
26  
27  
28  
29  
30  
31  
32  
33  
34  
35  
36  
37  
38  
39  
40  
41  
42  
43  
44  
45  
46  
47  
48  
49  
50  
51  
52  
53  
54  
55  
56  
57  
58  
59  
60
24. Janakiraman B, Abebe SM, Chala MB, Demissie SF. Epidemiology of General, Central Obesity and Associated Cardio-Metabolic Risks Among University Employees, Ethiopia: A Cross-Sectional Study. *Diabetes, Metabolic Syndrome and Obesity: Targets and Therapy*. 2020;13:343.
  25. Moges B, Amare B, Fantahun B, Kassu A. High prevalence of overweight, obesity, and hypertension with increased risk to cardiovascular disorders among adults in northwest Ethiopia: a cross sectional study. *BMC cardiovascular disorders*. 2014;14(1):155.
  26. Dagne S, Gelaw YA, Abebe Z, Wassie MM. Factors associated with overweight and obesity among adults in northeast Ethiopia: a cross-sectional study. *Diabetes, metabolic syndrome and obesity: targets and therapy*. 2019;12:391.
  27. Mekonnen T, Animaw W, Seyum Y. Overweight/obesity among adults in North-Western Ethiopia: a community-based cross sectional study. *Archives of Public Health*. 2018;76(1):18.
  28. Amare B, Moges B, Moges F, Fantahun B, Admassu M, Mulu A, et al. Nutritional status and dietary intake of urban residents in Gondar, Northwest Ethiopia. *BMC public health*. 2012;12(1):752.
  29. Abera D, Boltena MT. 1. Department of nutrition, Wolaita Sodo University, Ethiopia. 2. Wolaita Sodo University, Health Sciences and Medicine College, School of Public Health.
  30. Darebo T, Mesfin A, Gebremedhin S. Prevalence and factors associated with overweight and obesity among adults in Hawassa city, southern Ethiopia: a community based cross-sectional study. *BMC obesity*. 2019;6(1):8.
  31. Gutema BT, Chuka A, Kondale M, Ayele G, Kote M, Zerdo Z, et al. The Burden of Malnutrition among Adults Residing in Arba Minch Health and Demographic Surveillance Site (HDSS): A WHO STEPS Survey. *Journal of Nutrition and Metabolism*. 2020;2020.

- 1  
2  
3  
4  
5  
6  
7  
8  
9  
10  
11  
12  
13  
14  
15  
16  
17  
18  
19  
20  
21  
22  
23  
24  
25  
26  
27  
28  
29  
30  
31  
32  
33  
34  
35  
36  
37  
38  
39  
40  
41  
42  
43  
44  
45  
46  
47  
48  
49  
50  
51  
52  
53  
54  
55  
56  
57  
58  
59  
60
32. MarkosYohannes. PREVALENCE OF OVERWEIGHT AND OBESITY AMONG OFFICE-BASED URBAN CIVIL SERVANTS IN SOUTHERN NATIONS, NATIONALITIES AND PEOPLES' REGION, ETHIOPIA. *Ethiop Med J*, 2019, Vol. 57, No. 2.
33. Hundera TD, Gemede HF, Wirtu D, Kenie DN. Nutritional status and associated factors among lactating mothers in Nekemte Referral Hospital and Health Centers, Ethiopia. *Int J Nutr Food Sci*. 2015;4(2):216-22.
34. Hussein M. Overs Nitration and Associated Factors Among Women of Reproductive Age Group in Jigjiga Somal, National Regional State Eastern Ethiopia: Haramaya University; 2015.
35. Kahsay AB, Gebru HB, Maeruf H. Prevalence and factors associated with overweight/Obesity in public servants, Tigray, Ethiopia: The case of Mekelle city. *Research & Reviews: Journal of Medical Science and Technology*. 2019;7(3):39-46.
36. Yibeltal T, Charles T, Uriyoan C. The Rising Overweight-obesity and Its Socio-Demographic Correlates in Addis Ababa, Ethiopia, 2000-2011.
37. Mekonnen W, Bogale A. Determinants of Obesity Among Women of Childbearing Age in Urban Areas of Ethiopia. *Age*. 2017;15(19):993.
38. Abrha S, Shiferaw S, Ahmed KY. Overweight and obesity and its socio-demographic correlates among urban Ethiopian women: evidence from the 2011 EDHS. *BMC Public Health*. 2016;16(1):636.
39. Central Statistical Agency (CSA) [Ethiopia] and ICF International. 2016. Ethiopia Demographic and Health Survey 2016. Addis Ababa, Ethiopia, and Rockville, Maryland, USA: CSA and ICF. .

- 1  
2  
3  
4  
5  
6  
7  
8  
9  
10  
11  
12  
13  
14  
15  
16  
17  
18  
19  
20  
21  
22  
23  
24  
25  
26  
27  
28  
29  
30  
31  
32  
33  
34  
35  
36  
37  
38  
39  
40  
41  
42  
43  
44  
45  
46  
47  
48  
49  
50  
51  
52  
53  
54  
55  
56  
57  
58  
59  
60
40. Peng W, Mu Y, Hu Y, Li B, Raman J, Sui Z. Double Burden of Malnutrition in the Asia-Pacific Region—A Systematic Review and Meta-analysis. *Journal of Epidemiology and Global Health*. 2019.
  41. Ofori-Asenso R, Agyeman AA, Laar A, Boateng D. Overweight and obesity epidemic in Ghana—a systematic review and meta-analysis. *BMC Public Health*. 2016;16(1):1239.
  42. Vaisi-Raygani A, Mohammadi M, Jalali R, Ghobadi A, Salari N. The prevalence of obesity in older adults in Iran: a systematic review and meta-analysis. *BMC geriatrics*. 2019;19(1):1-9.
  43. Salimi Y, Taghdir M, Sepandi M, Zarchi A-AK. The prevalence of overweight and obesity among Iranian military personnel: a systematic review and meta-analysis. *BMC public health*. 2019;19(1):162.
  44. McEwen J, Russell E, Stewart S. Needs assessment in Scotland: collaboration in publichealth. *Public health*. 1995;109(3):179-85.
  45. Abdu Z, Kabeta T, Dube L, Tessema W, Abera M. Prevalence and associated factors of depression among prisoners in Jimma Town Prison, South West Ethiopia. *Psychiatry journal*. 2018;2018.
  46. Kamarulzaman A, Reid SE, Schwitters A, Wiessing L, El-Bassel N, Dolan K, et al. Prevention of transmission of HIV, hepatitis B virus, hepatitis C virus, and tuberculosis in prisoners. *The Lancet*. 2016;388(10049):1115-26.
  47. Aranceta-Bartrina J, Pérez-Rodrigo C, Alberdi-Aresti G, Ramos-Carrera N, Lázaro-Masedo S. Prevalence of general obesity and abdominal obesity in the Spanish adult population (aged 25–64 years) 2014–2015: the ENPE study. *Revista Española de Cardiología (English Edition)*. 2016;69(6):579-87.



- 1  
2 48. Chukwuonye II, Chuku A, John C, Ohagwu KA, Imoh ME, Isa SE, et al. Prevalence of  
3  
4 overweight and obesity in adult Nigerians—a systematic review. *Diabetes, metabolic*  
5  
6 *syndrome and obesity: targets and therapy.* 2013;6:43.  
7  
8  
9 49. Chatterji M, Baldwin AM, Prakash R, Vlack SA, Lambert SB. PUBLIC HEALTH  
10  
11 RESPONSE TO A MEASLES OUTBREAK IN A LARGE CORRECTIONAL FACILITY,  
12  
13 QUEENSLAND. *Commun Dis Intell.* 2014;38(4):E294-E7.  
14  
15  
16 50. Ojiambo RM, Easton C, Casajús JA, Konstabel K, Reilly JJ, Pitsiladis Y. Effect of  
17  
18 urbanization on objectively measured physical activity levels, sedentary time, and indices of  
19  
20 adiposity in Kenyan adolescents. *Journal of physical activity and health.* 2012;9(1):115-23.  
21  
22  
23 51. Assah FK, Ekelund U, Brage S, Mbanya JC, Wareham NJ. Urbanization, physical activity,  
24  
25 and metabolic health in sub-Saharan Africa. *Diabetes care.* 2011;34(2):491-6.  
26  
27  
28  
29  
30  
31  
32  
33  
34  
35  
36  
37  
38  
39  
40  
41  
42  
43  
44  
45  
46  
47  
48  
49  
50  
51  
52  
53  
54  
55  
56  
57  
58  
59  
60

**Supplementary Table 1:** Distribution of studies on the prevalence overweight and obesity among adults in Ethiopia, 2010-2020.

| Author              | Year of study | Publication year | Region        | Setting | Sample Size | Prevalence of overweight | Prevalence of obesity | Quality Score |
|---------------------|---------------|------------------|---------------|---------|-------------|--------------------------|-----------------------|---------------|
| Abera D, etal       | After 2015    | 2017             | SNNPR         | Urban   | 413         | 32.9                     | 7.7                   | Low risk      |
| Abrha S, etal       | Before 2015   | 2016             | Not specified | Urban   | 3602        | 12.1                     | 2.8                   | Low risk      |
| Tebekaw Y, etal     | Before 2015   | 2014             | Addis Ababa   | Urban   | 1592        | 16.3                     | 4.3                   | Low risk      |
| Amare B, etal       | Before 2015   | 2012             | Amhara        | Urban   | 356         | 21.3                     | 5.9                   | Low risk      |
| Awoke A, etal       | Before 2015   | 2012             | Amhara        | Urban   | 679         | 25.3                     | 5.6                   | Low risk      |
| Dagne S, etal       | After 2015    | 2019             | Amhara        | Urban   | 751         | 19.9                     | 8.6                   | Low risk      |
| Darebo T, etal      | After 2015    | 2019             | SNNPR         | Urban   | 524         | 23.2                     | 5                     | Low risk      |
| Gutema BT, etal     | After 2015    | 2020             | SNNPR         | Both    | 3,346       | 10.8                     | 1.9                   | Low risk      |
| Hundera TD, etal    | Before 2015   | 2015             | Oromia        | Urban   | 317         | 4.7                      | 1.6                   | Low risk      |
| Hussein M, etal     | After 2015    | 2016             | Somali        | Urban   | 698         | 22.4                     | 10.4                  | Low risk      |
| Kahsay AB, etal     | After 2015    | 2018             | Tigray        | Urban   | 1486        | 23.8                     | 3.5                   | Low risk      |
| Mekonnen T, etal    | After 2015    | 2018             | Amhara        | Both    | 1405        | 9.3                      | 2                     | Low risk      |
| Moges B, etal       | Before 2015   | 2014             | Amhara        | Urban   | 68          | 32.4                     | 16.2                  | Low risk      |
| Yohannes M          | After 2015    | 2019             | SNNPR         | Urban   | 374         | 40.1                     | 13.9                  | Low risk      |
| Janakiraman B, etal | After 2015    | 2020             | Amhara        | Urban   | 381         |                          | 13.1                  | Low risk      |
| Mekonnen W, etal    | Before 2015   | 2017             | Not specified | Urban   | 3535        |                          | 2.84                  | Low risk      |

### Publication bias test for overweight

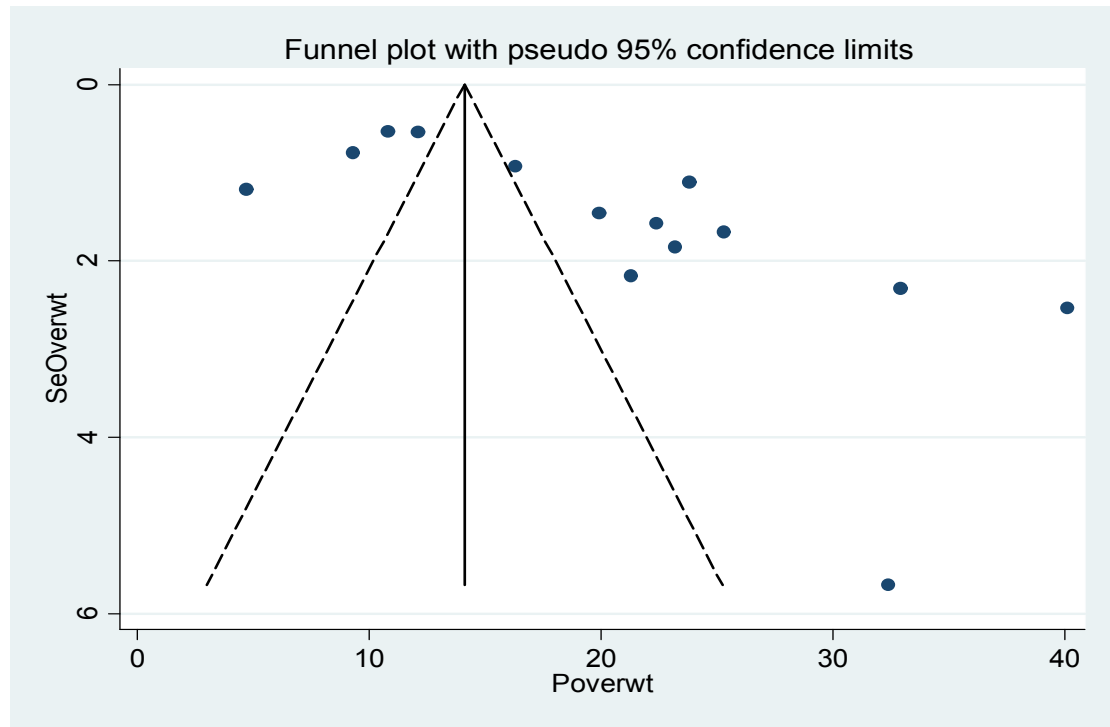

Supplementary Figure 1: Distribution of studies included in overweight analysis in the Funnel graph.

1  
2  
3 **Publication bias for obesity**  
4

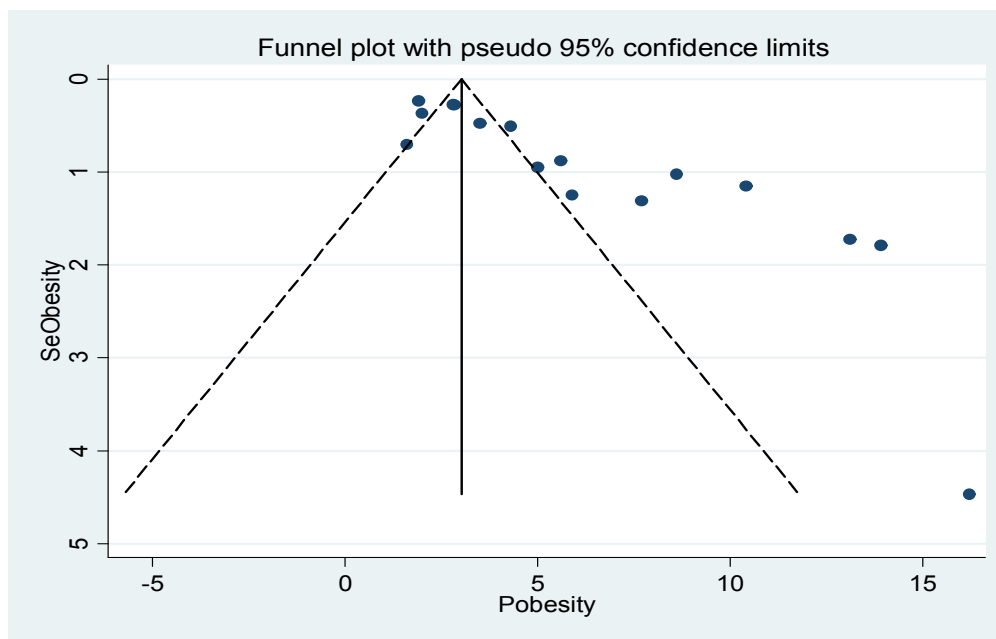

26 Supplementary Figure 2: Distribution of studies included in obesity analysis in the Funnel graph.  
27  
28  
29  
30  
31  
32  
33  
34  
35  
36  
37  
38  
39  
40  
41  
42  
43  
44  
45  
46  
47

## PRISMA FLOW CHART

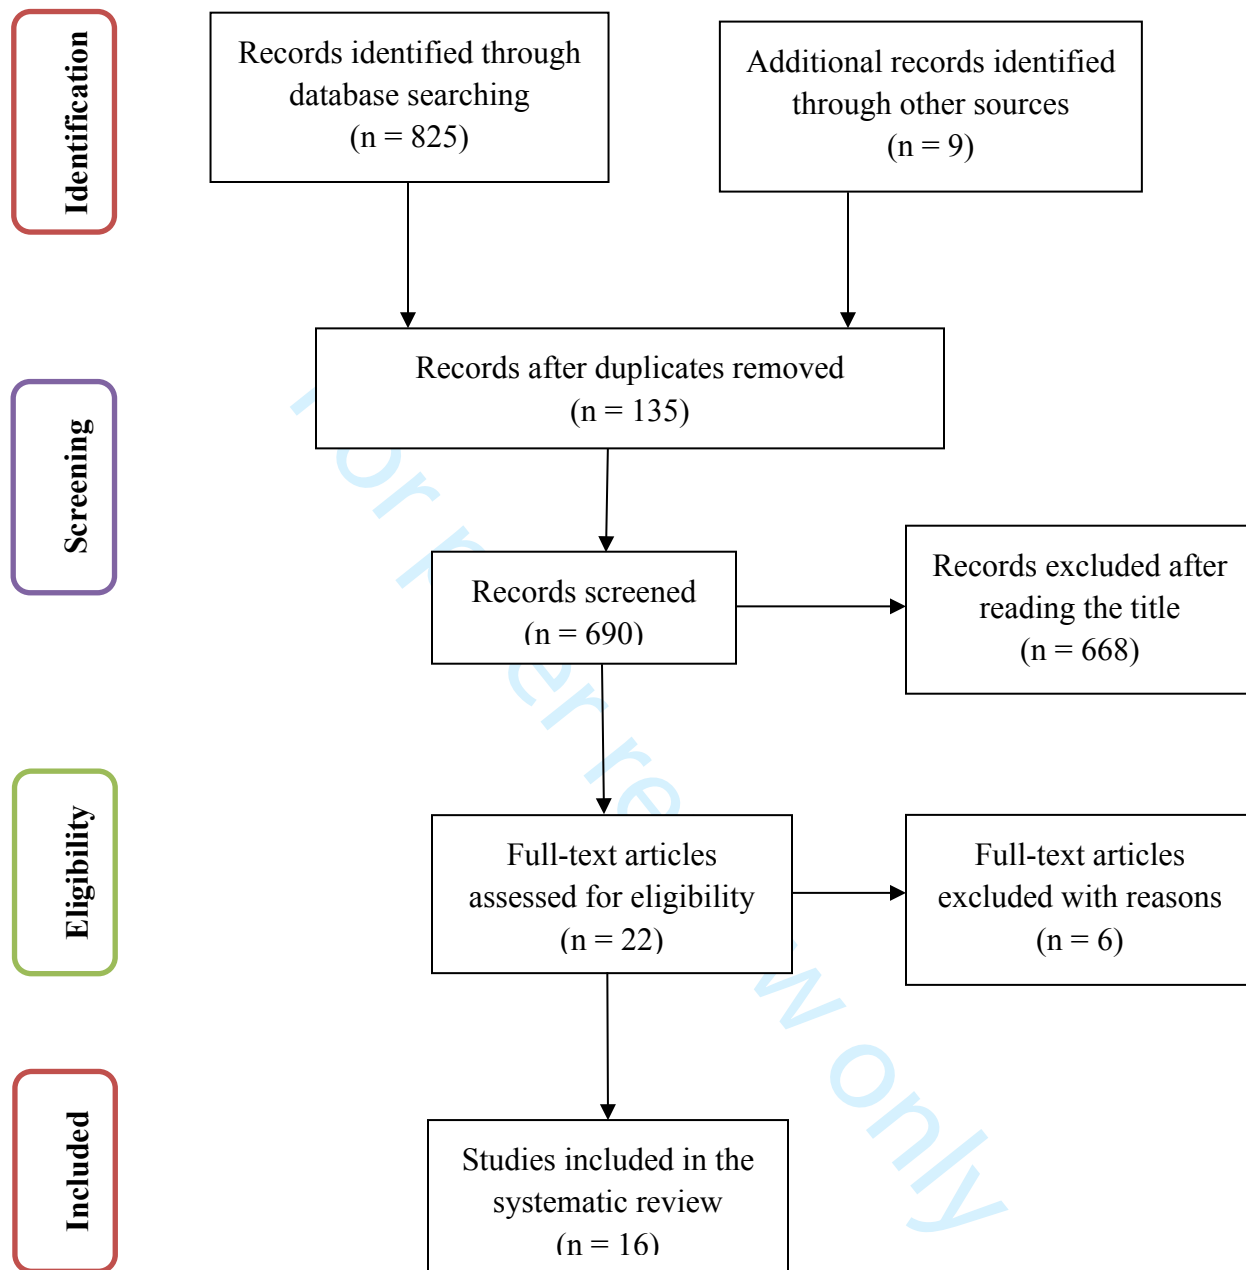

**Figure 1:** PRISMA flow chart of study selection for the prevalence of overweight and obesity among adults in Ethiopia.

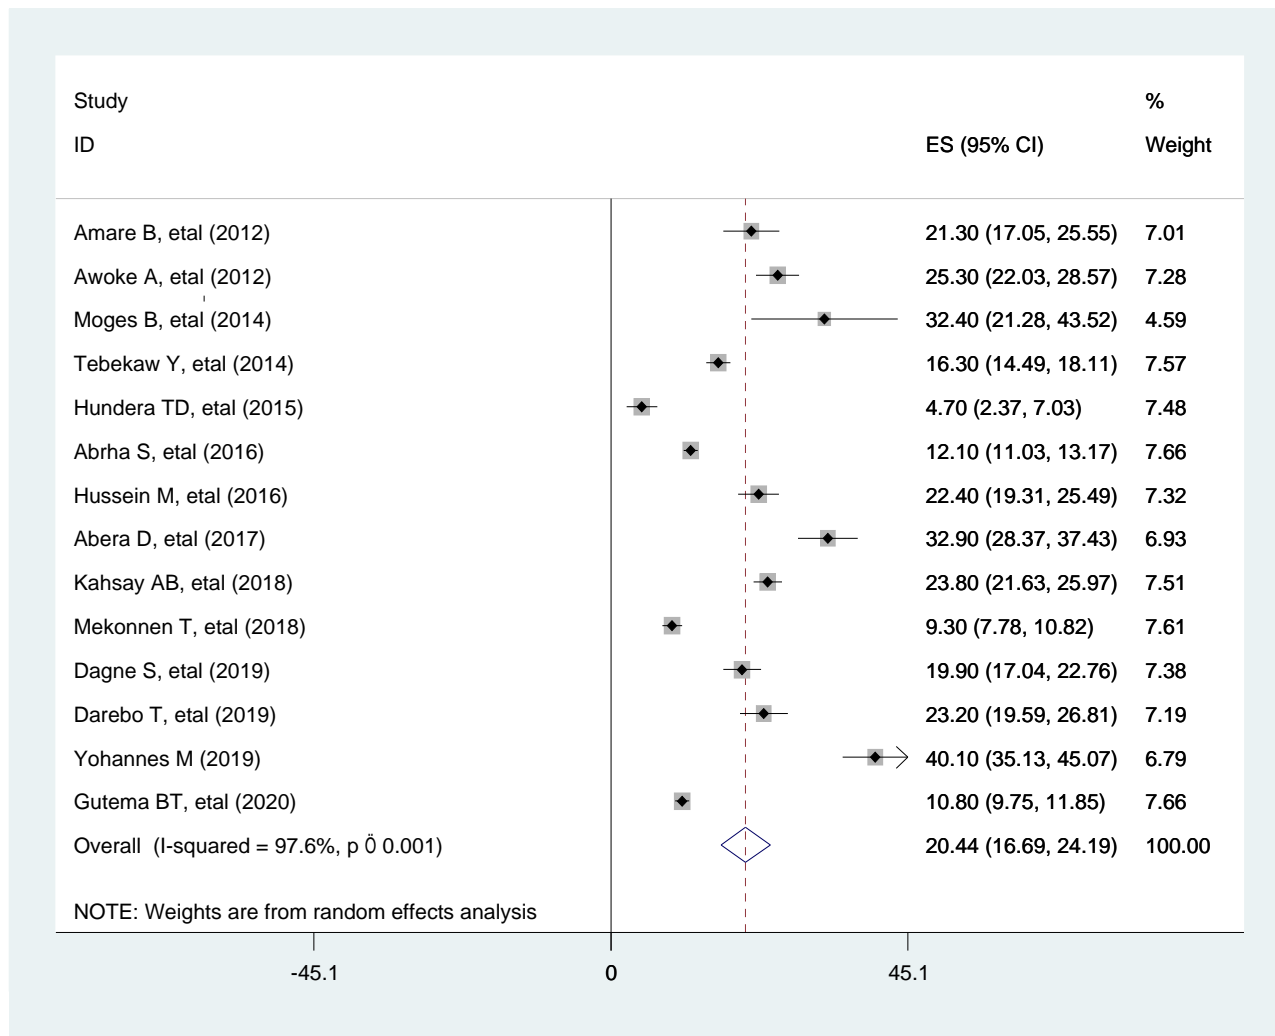

**Figure 2:** Forest plot for the prevalence of overweight among adults in Ethiopia.

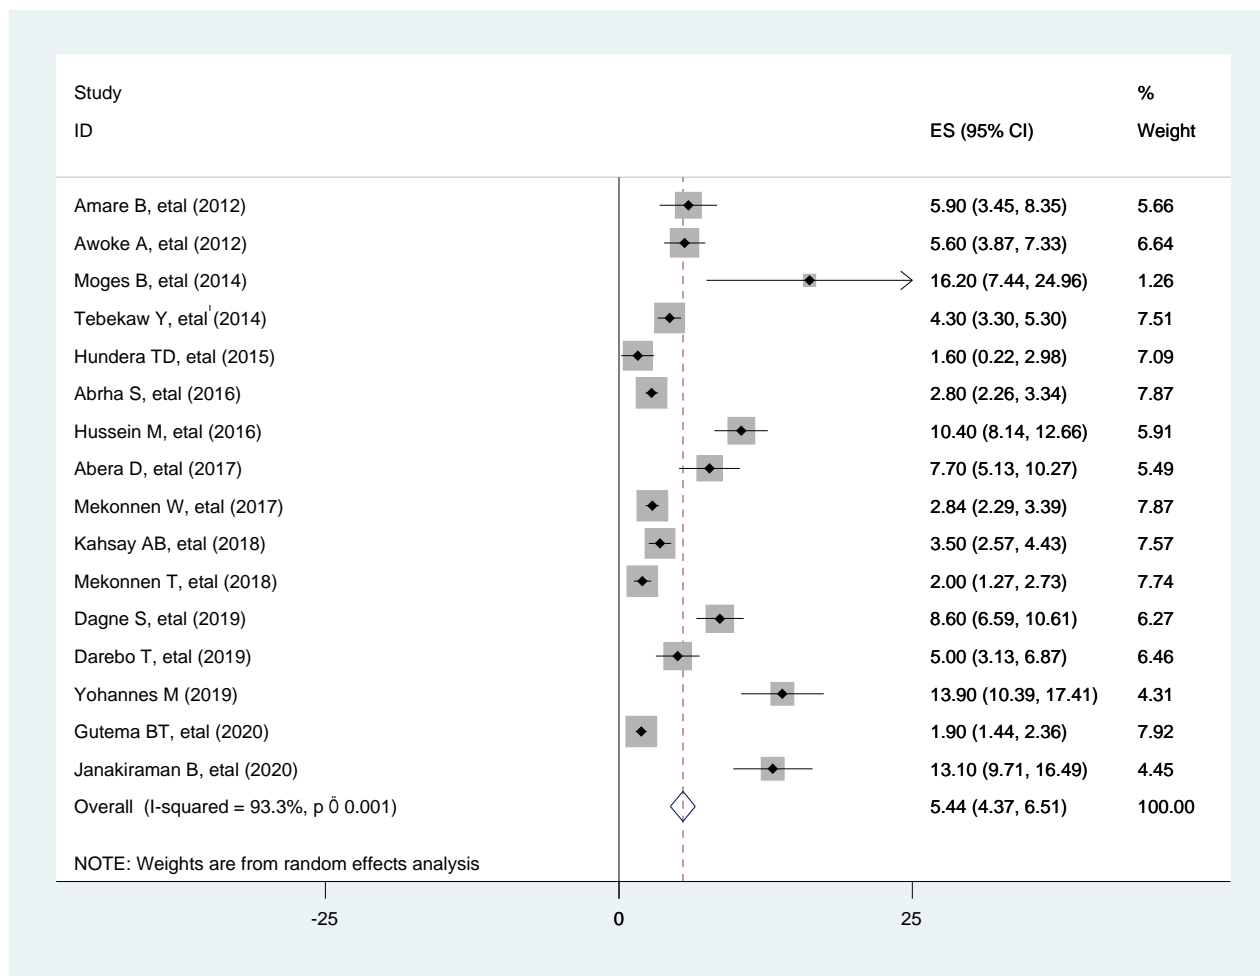

**Figure 3:** Forest plot for the prevalence of obesity among adults in Ethiopia.

| Study omitted    | Coef.     | [95% Conf. Interval] |
|------------------|-----------|----------------------|
| Abera D, etal    | 19.458002 | 15.773933 23.142069  |
| Abrha S, etal    | 21.24802  | 16.798456 25.697584  |
| Tebekaw Y, etal  | 20.829943 | 16.721661 24.938225  |
| Amare B, etal    | 20.375648 | 16.482386 24.268913  |
| Awoke A, etal    | 20.031092 | 16.230967 23.831217  |
| Dagne S, etal    | 20.491842 | 16.559935 24.42375   |
| Darebo T, etal   | 20.217529 | 16.353727 24.081333  |
| Gutema BT, etal  | 21.33058  | 17.008682 25.652477  |
| Hundera TD, etal | 21.686108 | 17.891603 25.480614  |
| Hussein M, etal  | 20.278517 | 16.404625 24.152409  |
| Kahsay AB, etal  | 20.123743 | 16.369978 23.87751   |
| Mekonnen T, etal | 21.394331 | 17.333912 25.45475   |
| Moges B, etal    | 19.859375 | 16.047747 23.671003  |
| Yohannes M       | 18.918518 | 15.393227 22.443808  |
| Combined         | 20.439183 | 16.689844 24.188523  |

**Figure 4:** Result of sensitivity analysis of the 14 studies in the meta-analysis of overweight.

| Study omitted    | Coef.      | [95% Conf. Interval]  |
|------------------|------------|-----------------------|
| Abera D, etal    | 5. 2844915 | 4. 2053108 6. 3636723 |
| Abrha S, etal    | 5. 8013558 | 4. 5596724 7. 0430388 |
| Tebekaw Y, etal  | 5. 5626507 | 4. 425869 6. 6994324  |
| Amare B, etal    | 5. 4089479 | 4. 3111115 6. 5067844 |
| Awoke A, etal    | 5. 4232454 | 4. 3210888 6. 5254025 |
| Dagne S, etal    | 5. 156126  | 4. 1098514 6. 2024007 |
| Darebo T, etal   | 5. 4749699 | 4. 3657789 6. 5841608 |
| Gutema BT, etal  | 5. 832715  | 4. 6363239 7. 0291057 |
| Hundera TD, etal | 5. 748404  | 4. 6261935 6. 8706145 |
| Hussein M, etal  | 5. 0217872 | 4. 0067286 6. 0368457 |
| Kahsay AB, etal  | 5. 6494417 | 4. 4939957 6. 8048878 |
| Mekonnen T, etal | 5. 787991  | 4. 6217656 6. 9542165 |
| Moges B, etal    | 5. 2873678 | 4. 2271786 6. 3475571 |
| Yohannes M       | 4. 9776611 | 3. 9654725 5. 98985   |
| Ahmed KY, etal   | 5. 4408903 | 4. 3709903 6. 5107903 |
| Daka DW, etal    | 5. 4408903 | 4. 3709903 6. 5107903 |
| Combi ned        | 5. 4408902 | 4. 3709902 6. 5107903 |

**Figure 5:** Result of sensitivity analysis of the 16 studies in the meta-analysis of obesity.

#### Egger's test

| Std_Eff | Coef.     | Std. Err. | t     | P> t   | [95% Conf. Interval] |
|---------|-----------|-----------|-------|--------|----------------------|
| slope   | 6. 137967 | 2. 411285 | 2. 55 | 0. 026 | . 8842288 11. 39171  |
| bias    | 9. 04124  | 2. 353041 | 3. 84 | 0. 002 | 3. 914404 14. 16808  |

**Figure 6:** Egger's test for the detection of publication bias for studies included in overweight.

#### Egger's test

| Std_Eff | Coef.     | Std. Err. | t     | P> t   | [95% Conf. Interval] |
|---------|-----------|-----------|-------|--------|----------------------|
| slope   | . 8714913 | . 4245854 | 2. 05 | 0. 059 | -. 0391538 1. 782136 |
| bias    | 5. 452998 | . 8718187 | 6. 25 | 0. 000 | 3. 583133 7. 322863  |

**Figure 7:** Egger's test for the detection of publication bias for studies included in obesity.



### Trim and fill analysis for the pooled prevalence of overweight

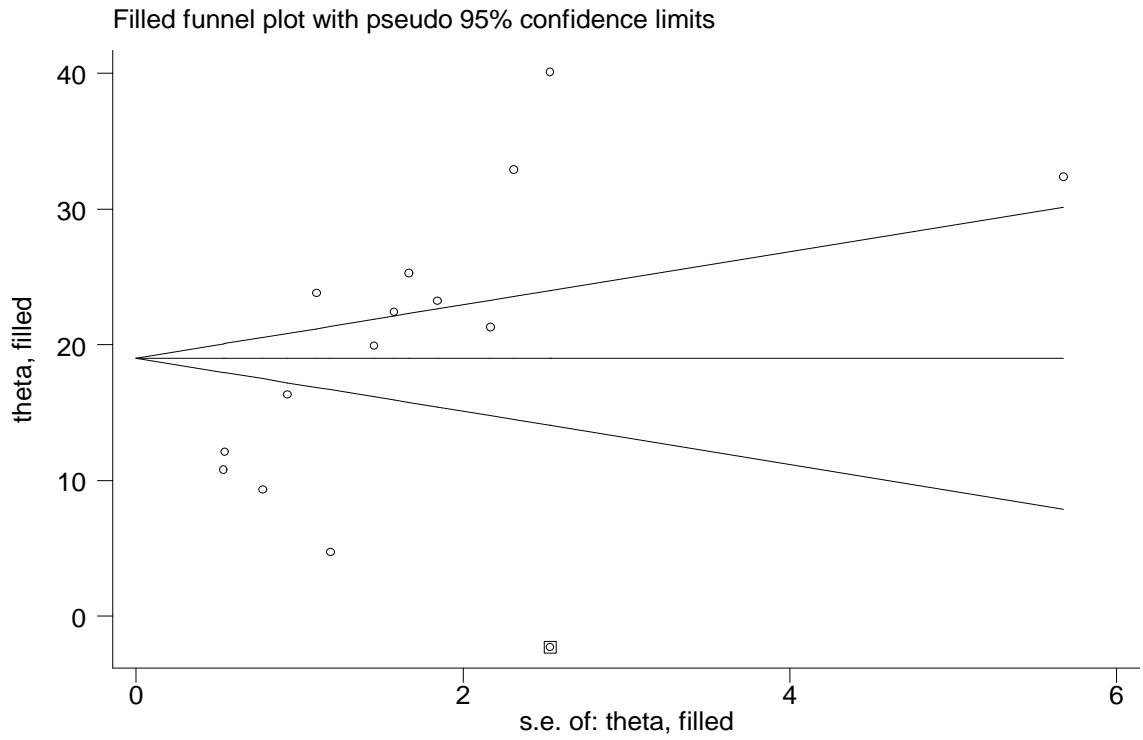

**Figure 8:** Trim and fill analysis for the prevalence of overweight among adults in Ethiopia.

review only

**Trim and fill analysis for the pooled prevalence of obesity**

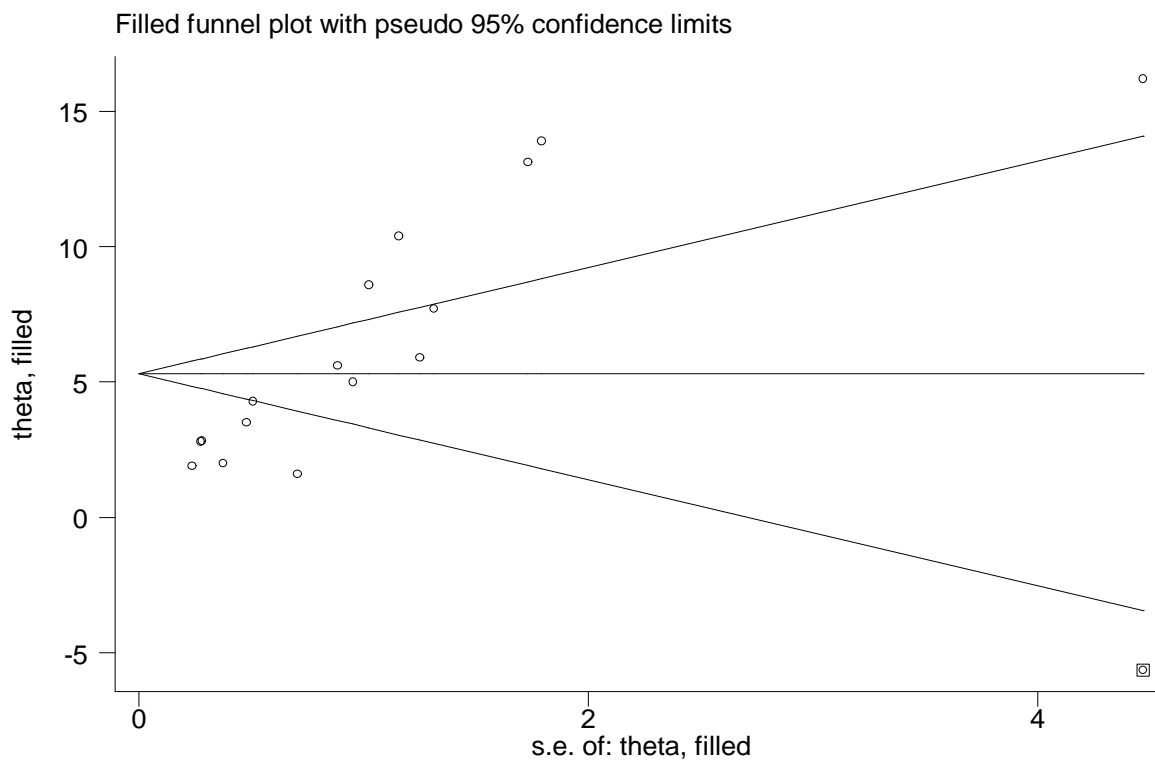

**Figure 9:** Trim and fill analysis for the prevalence of obesity among adults in Ethiopia.

**Publication bias test for overweight**

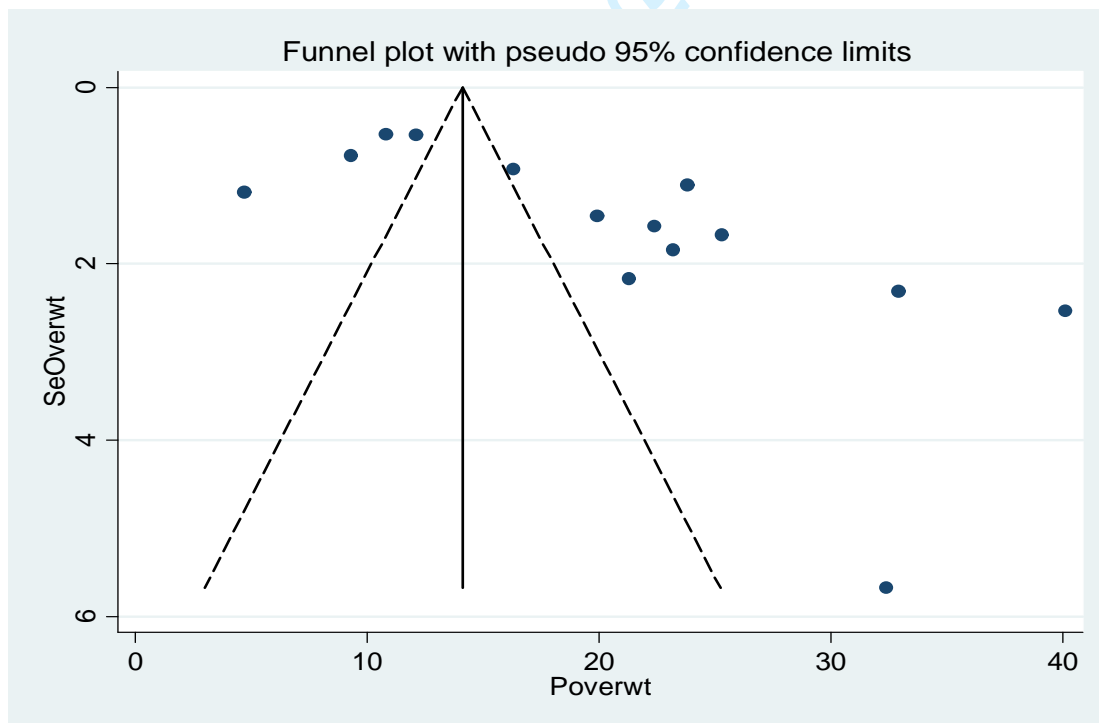

Supplementary Figure 10: Distribution of studies included in overweight analysis in the Funnel graph.

Publication bias for obesity

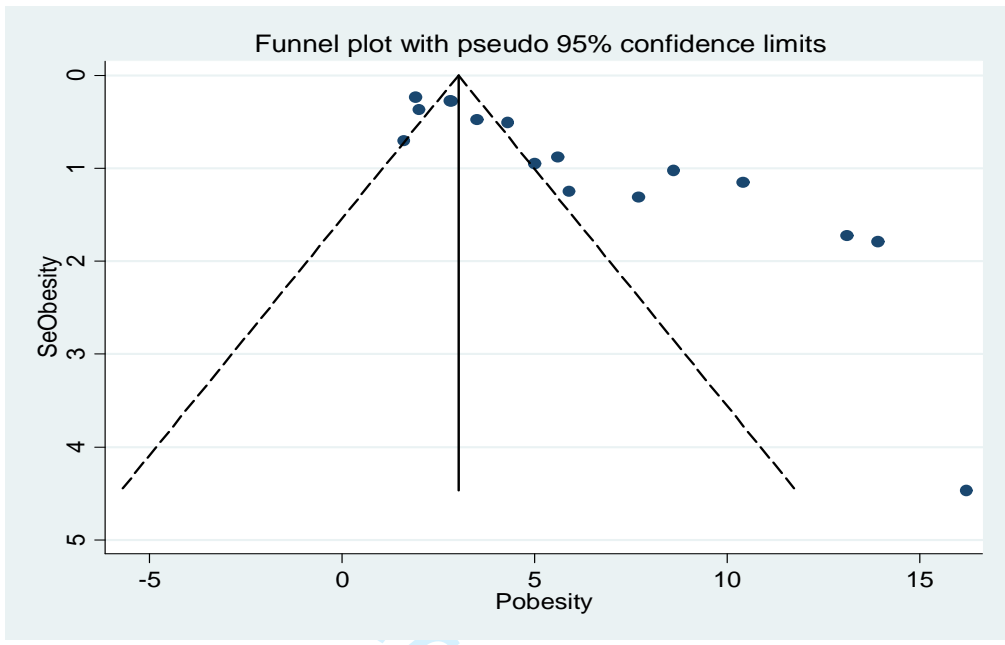

Supplementary Figure 11: Distribution of studies included in obesity analysis in the Funnel graph.

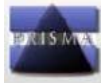

# PRISMA 2009 Checklist

| Section/topic                      | #  | Checklist item                                                                                                                                                                                                                                                                                              | Reported on page # |
|------------------------------------|----|-------------------------------------------------------------------------------------------------------------------------------------------------------------------------------------------------------------------------------------------------------------------------------------------------------------|--------------------|
| <b>TITLE</b>                       |    |                                                                                                                                                                                                                                                                                                             |                    |
| Title                              | 1  | Identify the report as a systematic review, meta-analysis, or both.                                                                                                                                                                                                                                         | 1                  |
| <b>ABSTRACT</b>                    |    |                                                                                                                                                                                                                                                                                                             |                    |
| Structured summary                 | 2  | Provide a structured summary including, as applicable: background; objectives; data sources; study eligibility criteria, participants, and interventions; study appraisal and synthesis methods; results; limitations; conclusions and implications of key findings; systematic review registration number. | 2                  |
| <b>INTRODUCTION</b>                |    |                                                                                                                                                                                                                                                                                                             |                    |
| Rationale                          | 3  | Describe the rationale for the review in the context of what is already known.                                                                                                                                                                                                                              | 3-4                |
| Objectives                         | 4  | Provide an explicit statement of questions being addressed with reference to participants, interventions, comparisons, outcomes, and study design (PICOS).                                                                                                                                                  | 4                  |
| <b>METHODS</b>                     |    |                                                                                                                                                                                                                                                                                                             |                    |
| Protocol and registration          | 5  | Indicate if a review protocol exists, if and where it can be accessed (e.g., Web address), and, if available, provide registration information including registration number.                                                                                                                               | N/A                |
| Eligibility criteria               | 6  | Specify study characteristics (e.g., PICOS, length of follow-up) and report characteristics (e.g., years considered, language, publication status) used as criteria for eligibility, giving rationale.                                                                                                      | 4-5                |
| Information sources                | 7  | Describe all information sources (e.g., databases with dates of coverage, contact with study authors to identify additional studies) in the search and date last searched.                                                                                                                                  | 3-6                |
| Search                             | 8  | Present full electronic search strategy for at least one database, including any limits used, such that it could be repeated.                                                                                                                                                                               | 4-5                |
| Study selection                    | 9  | State the process for selecting studies (i.e., screening, eligibility, included in systematic review, and, if applicable, included in the meta-analysis).                                                                                                                                                   | 5-7                |
| Data collection process            | 10 | Describe method of data extraction from reports (e.g., piloted forms, independently, in duplicate) and any processes for obtaining and confirming data from investigators.                                                                                                                                  | 5                  |
| Data items                         | 11 | List and define all variables for which data were sought (e.g., PICOS, funding sources) and any assumptions and simplifications made.                                                                                                                                                                       | 3-6                |
| Risk of bias in individual studies | 12 | Describe methods used for assessing risk of bias of individual studies (including specification of whether this was done at the study or outcome level), and how this information is to be used in any data synthesis.                                                                                      | 6                  |
| Summary measures                   | 13 | State the principal summary measures (e.g., risk ratio, difference in means).                                                                                                                                                                                                                               | 8                  |
| Synthesis of results               | 14 | Describe the methods of handling data and combining results of studies, if done, including measures of consistency (e.g., $I^2$ ) for each meta-analysis.                                                                                                                                                   | 8-10               |

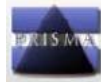

# PRISMA 2009 Checklist

Page 1 of 2

| Section/topic                 | #  | Checklist item                                                                                                                                                                                           | Reported on page # |
|-------------------------------|----|----------------------------------------------------------------------------------------------------------------------------------------------------------------------------------------------------------|--------------------|
| Risk of bias across studies   | 15 | Specify any assessment of risk of bias that may affect the cumulative evidence (e.g., publication bias, selective reporting within studies).                                                             | 12                 |
| Additional analyses           | 16 | Describe methods of additional analyses (e.g., sensitivity or subgroup analyses, meta-regression), if done, indicating which were pre-specified.                                                         | 10-12              |
| <b>RESULTS</b>                |    |                                                                                                                                                                                                          |                    |
| Study selection               | 17 | Give numbers of studies screened, assessed for eligibility, and included in the review, with reasons for exclusions at each stage, ideally with a flow diagram.                                          | 7                  |
| Study characteristics         | 18 | For each study, present characteristics for which data were extracted (e.g., study size, PICOS, follow-up period) and provide the citations.                                                             | 8                  |
| Risk of bias within studies   | 19 | Present data on risk of bias of each study and, if available, any outcome level assessment (see item 12).                                                                                                | 10-12              |
| Results of individual studies | 20 | For all outcomes considered (benefits or harms), present, for each study: (a) simple summary data for each intervention group (b) effect estimates and confidence intervals, ideally with a forest plot. | 9-11               |
| Synthesis of results          | 21 | Present results of each meta-analysis done, including confidence intervals and measures of consistency.                                                                                                  | 9-12               |
| Risk of bias across studies   | 22 | Present results of any assessment of risk of bias across studies (see Item 15).                                                                                                                          | 12                 |
| Additional analysis           | 23 | Give results of additional analyses, if done (e.g., sensitivity or subgroup analyses, meta-regression [see Item 16]).                                                                                    | 10-12              |
| <b>DISCUSSION</b>             |    |                                                                                                                                                                                                          |                    |
| Summary of evidence           | 24 | Summarize the main findings including the strength of evidence for each main outcome; consider their relevance to key groups (e.g., healthcare providers, users, and policy makers).                     | 14-15              |
| Limitations                   | 25 | Discuss limitations at study and outcome level (e.g., risk of bias), and at review-level (e.g., incomplete retrieval of identified research, reporting bias).                                            | 14-16              |
| Conclusions                   | 26 | Provide a general interpretation of the results in the context of other evidence, and implications for future research.                                                                                  | 16                 |
| <b>FUNDING</b>                |    |                                                                                                                                                                                                          |                    |
| Funding                       | 27 | Describe sources of funding for the systematic review and other support (e.g., supply of data); role of funders for the systematic review.                                                               | 16                 |

From: Moher D, Liberati A, Tetzlaff J, Altman DG, The PRISMA Group (2009). Preferred Reporting Items for Systematic Reviews and Meta-Analyses: The PRISMA Statement. PLoS Med 6(7): e1000097. doi:10.1371/journal.pmed1000097

For more information, visit: [www.prisma-statement.org](http://www.prisma-statement.org).

Page 2 of 2  
For peer review only - <http://bmjopen.bmj.com/site/about/guidelines.xhtml>

# BMJ Open

## Prevalence of overweight/obesity among the adult population in Ethiopia: A systematic review and meta-analysis

|                                 |                                                                                                                                                                                        |
|---------------------------------|----------------------------------------------------------------------------------------------------------------------------------------------------------------------------------------|
| Journal:                        | <i>BMJ Open</i>                                                                                                                                                                        |
| Manuscript ID                   | bmjopen-2020-039200.R1                                                                                                                                                                 |
| Article Type:                   | Original research                                                                                                                                                                      |
| Date Submitted by the Author:   | 12-Jun-2020                                                                                                                                                                            |
| Complete List of Authors:       | Kassie, Ayelign; Woldia University, Nursing; Abate, Biruk; Woldia University, Nursing; Woldia University, Nursing Wudu, Mesfin; Woldia University, Nursing; Woldia University, Nursing |
| <b>Primary Subject Heading</b>: | Nutrition and metabolism                                                                                                                                                               |
| Secondary Subject Heading:      | Public health                                                                                                                                                                          |
| Keywords:                       | NUTRITION & DIETETICS, PUBLIC HEALTH, Nutritional support < GASTROENTEROLOGY                                                                                                           |
|                                 |                                                                                                                                                                                        |

SCHOLARONE™  
Manuscripts

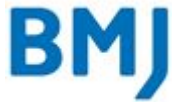

I, the Submitting Author has the right to grant and does grant on behalf of all authors of the Work (as defined in the below author licence), an exclusive licence and/or a non-exclusive licence for contributions from authors who are: i) UK Crown employees; ii) where BMJ has agreed a CC-BY licence shall apply, and/or iii) in accordance with the terms applicable for US Federal Government officers or employees acting as part of their official duties; on a worldwide, perpetual, irrevocable, royalty-free basis to BMJ Publishing Group Ltd ("BMJ") its licensees and where the relevant Journal is co-owned by BMJ to the co-owners of the Journal, to publish the Work in this journal and any other BMJ products and to exploit all rights, as set out in our [licence](#).

The Submitting Author accepts and understands that any supply made under these terms is made by BMJ to the Submitting Author unless you are acting as an employee on behalf of your employer or a postgraduate student of an affiliated institution which is paying any applicable article publishing charge ("APC") for Open Access articles. Where the Submitting Author wishes to make the Work available on an Open Access basis (and intends to pay the relevant APC), the terms of reuse of such Open Access shall be governed by a Creative Commons licence – details of these licences and which [Creative Commons](#) licence will apply to this Work are set out in our licence referred to above.

Other than as permitted in any relevant BMJ Author's Self Archiving Policies, I confirm this Work has not been accepted for publication elsewhere, is not being considered for publication elsewhere and does not duplicate material already published. I confirm all authors consent to publication of this Work and authorise the granting of this licence.

# Prevalence of overweight/obesity among the adult population in Ethiopia: A systematic review and meta-analysis

Ayalign Mengesha Kassie<sup>1</sup>, Biruk Beletew Abate<sup>2</sup>, Mesfin Wudu Kassaw<sup>3</sup>

## **Author details:**

<sup>1</sup>\*Ayalign Mengesha Kassie (MSc in adult health nursing) corresponding author: *E-mail: [ayalignmengesha59@gmail.com](mailto:ayalignmengesha59@gmail.com); Tel: +251937384459*

<sup>2</sup>Biruk Beletew Abate (MSc in pediatrics & child health nursing)

<sup>3</sup>Mesfin Wudu Kassaw (MSc in pediatrics & child health nursing)

<sup>1,2,3</sup>Department of Nursing, College of Health Sciences, Woldia University, P.O.Box 400 Woldia, Ethiopia.

## **Abstract**

**Background:** Overweight and obesity are emerging public health problems in Ethiopia. However, primary study findings on the prevalence of overweight and obesity in Ethiopia are inconsistent. Therefore, this study aimed to estimate the pooled prevalence of overweight and obesity among adults in Ethiopia.

**Methods:** Studies that looked at overweight and obesity among adults were searched from four international databases. The search involved articles published from January 1<sup>st</sup>, 2010 to March 10<sup>th</sup>, 2020. The Cochran's Q chi-square and the I<sup>2</sup> test statistics were used to check heterogeneity among the studies. The funnel plot and Egger's regression tests were also used to assess the presence of publication bias. Subgroup analysis was performed by residence, study setting, sample size, and year of study. Sensitivity analysis was also done to assess the effect of a single study on the pooled estimates. Data analysis was done using STATA<sup>TM</sup> Version 14 software program.

**Results:** A total of 16 studies with 19,527 study participants were included in this systematic review and meta-analysis. The estimated pooled prevalence of overweight among adults in Ethiopia was 20.4%, and after adjustment for publication bias with the trim and fill analysis, the estimated prevalence rate was changed to 19%. Besides, the estimated pooled prevalence of obesity was 5.4%. The prevalence of overweight was higher, 22.6% in studies published since 2015, 22.4% in studies conducted only in urban settings, and 24.4% in studies with small sample



1 size ( $\leq 384$  participants). Similarly, the prevalence of obesity was 6.9% in studies published  
2 since 2015, 6.2% in studies conducted only in urban settings, 6.4% in institution-based settings,  
3 and 9.6% in studies with small sample size.  
4  
5  
6

7 **Conclusion:** The prevalence of overweight and obesity is high in Ethiopia compared to previous  
8 studies. This needs large scale awareness creation campaigns and situation-based and context-  
9 specific prevention strategies.  
10  
11  
12

13 **Keywords:** Adult; Ethiopia; Obesity; Overweight  
14  
15

## 16 **Strength and limitation of the study**

17

### 18 **Strength**

19

- 20 ❖ The study has used a pre-specified protocol for search strategy and data abstraction and  
21 used internationally accepted tools for a critical appraisal system for quality assessment of  
22 individual studies.  
23  
24  
25  
26

### 27 **Limitations**

28

- 29 ❖ It is difficult to determine if the results from various regions are representative of the entire  
30 country, as no data were found for all regions of the country.  
31  
32
- 33 ❖ Furthermore, the majority of the studies were conducted in urban settings and only two  
34 studies were obtained involving participants from both rural and urban settings. Hence, the  
35 results may not truly reflect the rural population of Ethiopia.  
36  
37

## 38 **Introduction**

39

40  
41 Overnutrition is becoming a major public health problem globally. Overweight, obesity,  
42 and diet-related non-communicable diseases are included under problems of overnutrition (1).  
43 Overweight and obesity are used to refer an abnormal or excessive fat accumulation that can put  
44 people at greater risk and may impair their health (2).  
45  
46  
47

48  
49 Obesity is considered an illness that necessitates immediate reversal to prevent early and  
50 untimely death among patients. Because people with obesity are more likely to have other  
51 diseases including type 2 diabetes, high blood pressure, sleep apnea, and many more (3, 4).  
52  
53  
54  
55  
56  
57

1  
2 Overweight and obesity affect all age groups of people both in developed and developing  
3 countries regardless of their socioeconomic status (1, 5). Since 1980; the prevalence of obesity  
4 has doubled in more than 70 countries and has continuously increased in most other countries  
5 (6).  
6  
7

8  
9 In 2016, more than 1.9 billion adults were overweight worldwide. Of these, over 650  
10 million were obese. Overweight accounted for 39% (39% of men and 40% of women), and  
11 obesity 13% (11% of men and 15% of women) in the same year (7).  
12  
13

14  
15 The prevalence of overweight and obesity is escalating in developing countries,  
16 particularly among urban dwellers and wealthier people due to the influence of demographic,  
17 epidemiologic, and nutrition transitions (8). According to a study conducted in 2013 on the  
18 global trends of overweight and obesity, 26.9% of adults in Africa are overweight and obese (9).  
19  
20  
21

22  
23 Overweight and obesity in adults are associated with increased risk of diabetes,  
24 hypertension, and other chronic diseases. In addition to these chronic diseases, overweight and  
25 obesity in women increases the risk of cesarean section delivery, postpartum hemorrhage, high  
26 birth weight babies, and infant overweight and obesity (1, 10).  
27  
28  
29

30  
31 The latest WHO reports showed that overweight and obesity are becoming the leading  
32 causes of death worldwide (1, 11). In 2015, high body mass index (BMI) has caused an  
33 estimated 4 million deaths globally, and nearly 40% of these deaths occurred in persons who  
34 were overweight but not obese. More than two-thirds of the deaths related to high BMI were due  
35 to cardiovascular diseases (6, 12).  
36  
37  
38

39  
40 Overweight and obesity costs the world billions of dollars a year in lost opportunities for  
41 economic growth and lost investments in human capital associated with the increased  
42 preventable morbidity and mortality rates in both children and adults (1, 13).  
43  
44  
45

46  
47 Like other countries, the burden of overweight and obesity is becoming a major problem  
48 in Ethiopia. According to the 2016 Ethiopian demographic and health survey report, the  
49 proportion of overweight and obesity among women has increased from 3% in 2000 to 8% in  
50 2016. Similarly, 3% of men were overweight or obese in 2016 (14).  
51  
52  
53

54  
55 Overweight and obesity are associated with many factors including excessive  
56 consumption of alcohol, cigarette smoking, and sedentary lifestyle habits (15). Some studies  
57

1 have also reported that the risk of overweight and obesity is increased with education (16, 17)  
2 and wealth in developing countries (18-20).  
3  
4

5  
6 As a treatment, behavioral and pharmaceutical interventions are available and helpful in  
7 getting weight loss. A reduction of 5% to 7% of body weight alone is associated with a lower  
8 incidence of diabetes, hypertension, and other cardiovascular diseases. Larger weight loss has  
9 even been linked with better improvements in controlling the level of blood glucose and lipids in  
10 limited surgical outcomes data (21).  
11  
12  
13

14  
15 Therefore, knowing the prevalence of overweight and obesity is paramount to design  
16 preventive strategies. However, there is no national study on the prevalence of overweight and  
17 obesity in the general adult population of Ethiopia. Furthermore, findings from small studies are  
18 inconsistent with the combined prevalence of overweight and obesity reported ranging from  
19 4.5% (22) to 21.4% (23) in the country. Hence, this systematic review and meta-analysis aimed  
20 to determine the pooled prevalence of overweight and obesity among adults in Ethiopia.  
21  
22  
23  
24

## 25 26 **Methods**

### 27 28 **Literature search strategy**

29  
30 Firstly, The Cochrane Library, Joanna Briggs Institute (JBI), and PROSPERO databases  
31 were searched to check whether a systematic review and meta-analysis studies exist or for the  
32 presence of ongoing projects related to overweight and obesity in Ethiopia. The necessary  
33 articles were searched using PubMed, Scopus, Google scholar, and African journals online.  
34  
35  
36  
37  
38

39 For this study relevant articles were identified using the following terms: “overweight”,  
40 “obesity”, “nutrition”, “malnutrition”, “undernutrition”, “over nutrition”, “adults”, “elders”,  
41 “geriatrics” and “Ethiopia”. The key terms were used in combination using Boolean operators  
42 like “OR” or “AND”. The searches were restricted to full texts, free articles, human studies, and  
43 English language publications. This search involved articles published from January 1<sup>st</sup>, 2010 to  
44 March 10<sup>th</sup>, 2020.  
45  
46  
47  
48  
49

50 Grey literatures like surveillance reports, academic dissertations, and conference abstracts  
51 were also examined and included when they deemed low risk. Besides, the reference lists of  
52 included articles in this systematic review and meta-analysis were hand-searched to identify any  
53 relevant additional articles.  
54  
55  
56  
57

1 **PubMed search strategy:** (((((((((((overweight)) OR (obesity)) OR (nutrition)) OR  
2 (malnutrition)) OR (overnutrition)) OR (undernutrition)) AND (Adults)) OR (Elders)) OR  
3 (Geriatrics)) AND (Ethiopia)) AND (("2010/01/01"[Date - Entry]: "2020/10/03"[Date - Entry])).  
4  
5 Filters applied: Free full text, in the last 10 years.  
6  
7

## 8 **Eligibility criteria**

9  
10  
11 Studies were included in this systematic review and meta-analysis if they followed the  
12 following guidelines: (1) all observational study designs (cross-sectional, case-control, and  
13 cohort studies) which reported the prevalence of overweight and obesity or one of them; (2)  
14 published from 2010 to 2020; (3) published in the English language; (4) abstract and, or full text  
15 available for this review; and (5) conducted in Ethiopia. Studies were excluded if they: (1)  
16 possessed a poor quality score as per the stated criteria; (2) failed to determine the desired  
17 outcomes (overweight and obesity); and (3) included children and adolescents. It was considered  
18 that the exclusion of articles published in other languages due to translation issues might create  
19 language bias. However, no articles published in other languages including the Amharic  
20 language were obtained during the search period.  
21  
22  
23  
24  
25  
26  
27  
28

## 29 **Outcomes of interest**

30  
31  
32 The main outcomes of interest were the prevalence of overweight and obesity reported in  
33 the original papers either as a percentage or as the number of cases (n) / total number of study  
34 participants (N). These two parameters were necessary to calculate the pooled prevalence of  
35 overweight and obesity in the meta-analysis. Therefore, the prevalence rate was calculated by  
36 dividing the number of individuals who were overweight and, or obese to the total number of  
37 study participants (sample size) multiplied by 100.  
38  
39  
40  
41  
42

43 The outcome variables of interest were categorized as follows based on the WHO  
44 Classification of body mass index; overweight if the BMI is 25.0-29.9kg/m<sup>2</sup> and obese if it  
45 is  $\geq 30.0$ kg/m<sup>2</sup> for the study participants of the included studies in the systematic review and meta-  
46 analysis (24).  
47  
48  
49  
50

## 51 **Data extraction**

52  
53 The authors developed a data extraction form on the excel sheet which includes the  
54 author name, year of publication, study setting, study design, sex of participants, sample size,  
55  
56  
57

1 and the prevalence of overweight and obesity. The data extraction sheet was piloted using 5  
2 papers randomly. The extraction form was adjusted after having a piloted template.  
3  
4

5  
6 Two of the authors independently extracted all the necessary data from each study using  
7 the data extraction format. The third author checked the correctness of the data independently.  
8 Any disagreements between authors who extracted the data were resolved through discussions  
9 with the third reviewer and fourth reviewer when required. For articles that did not provide  
10 details of their study background, corresponding authors were contacted through e-mail and  
11 asked for the relevant information, such as study time, region, or others.  
12  
13  
14  
15

### 16 17 **Quality assessment**

18  
19 Two independent authors assessed the methodological quality of all of the potential  
20 studies to be included in the analysis. Any disagreements between the authors were resolved  
21 through discussion or, if consensus could not be reached, consultation with a third independent  
22 author was considered. The quality of each included study was assessed using the JBI quality  
23 appraisal checklist for cross-sectional studies (25). Because the articles included in this study  
24 were all cross-sectional. Studies were considered low risk when scored 50% and above of the JBI  
25 quality assessment indicators.  
26  
27  
28  
29  
30  
31

### 32 **Patient and public involvement**

33  
34 No patient involved.  
35

### 36 **Statistical analysis**

37  
38 To obtain the pooled prevalence of overweight and obesity, a meta-analysis using the  
39 random-effects model was performed due to the presence of heterogeneity (26). Cochran's Q  
40 chi-square statistic and the  $I^2$  tests were run to assess the random variations between primary  
41 studies. The  $I^2$  test is used to indicate the percentage of variance in a meta-analysis that is  
42 attributable to heterogeneity among the studies (27). In this study, heterogeneity was interpreted  
43 as an  $I^2$  value of 0% = no heterogeneity,  $\leq 25\%$  = low, 25%-50% = moderate, 50-75= substantial  
44 and  $\geq 75\%$  = high level heterogeneity (27). In the case of high heterogeneity, subgroup and  
45 sensitivity analyses were run to identify possible moderators for the heterogeneity.  
46  
47  
48  
49  
50  
51  
52  
53  
54  
55  
56  
57

## Publication bias

Methods of avoiding publication bias like identifying and including unpublished studies, meeting abstracts, and dissertations were considered. Furthermore, potential publication bias was assessed by visually inspecting the funnel plots and objectively using the Egger's bias test during analysis (28). The trim and fill analysis was also done to assess for and adjust any publication bias based on the assumption that the effect sizes of all the studies are normally distributed around the center of a funnel plot in the absence of publication bias.

The trim and fill method is used to first trim the studies that cause asymmetry in the funnel's plot so that the overall effect estimate produced by the remaining studies can be considered minimally affected by publication bias, and then to fill imputed missing studies in the funnel plot based on the bias-corrected overall estimate (29). The meta-analysis was performed using the STATA™ Version 14 software program (30). Finally, for all analysis, a p-value of less than 0.05 was considered to declare statistically significant values.

## Presentation and reporting of results

The results of this systematic review and meta-analysis were reported based on the Preferred Reporting Items for Systematic Review and Meta-Analysis statement (PRISMA) guideline (31). The entire process of study screening, selection, and inclusion are shown with the support of a flow diagram. Moreover, tables and narrative summaries are used to report the risk of bias for every eligible study.

## Results

### Search results

A total of 834 articles were retrieved from international databases and gray literatures. In the first step of article searches, 825 studies that were published from 2010-2020 were retrieved through database searching from four international databases. On the other hand, the remaining 9 studies have been obtained from other sources including gray literatures.

Of these studies, 135 duplicate records were identified and after duplication removal, a total of 699 articles remained. Then, 677 articles were excluded after reading the title and or the abstract because either they were not conducted in Ethiopia or they were not in line with the objective of this systematic review and meta-analysis.

1  
2 Finally, 22 studies were screened for full-text review and, 16 articles (n = 19,527  
3 participants) were selected to estimate the pooled prevalence of overweight and obesity among  
4 adults in Ethiopia. The remaining 6 studies were excluded because they failed to report the  
5 prevalence of overweight and obesity separately (they only reported a combined prevalence of  
6 overweight and obesity). The detailed steps in the screening process are shown in the PRISMA  
7 flow chart of the study selection (Fig 1).  
8  
9  
10  
11

### 12 **Baseline characteristics of included studies**

13  
14  
15 In the current meta-analysis, a total of 16 studies with 19,527 study participants were  
16 included to estimate the pooled prevalence of overweight and obesity among adults in Ethiopia.  
17 Among these studies, 14 had reported the prevalence of both overweight and obesity, and 2  
18 studies had reported the prevalence of obesity only. Concerning the study design, all of the  
19 studies included were cross-sectional. The studies included in this systematic review and meta-  
20 analysis varied significantly in sample size ranging from 68 (the small) to 6,602 (the large).  
21  
22  
23  
24  
25

26  
27 Overall information regarding the prevalence of overweight and obesity among adults  
28 was obtained from various regions in the country. Six of the studies involved participants from  
29 Amhara (32-37), four from SNNPR (38-41), one from Oromia (42), one from Somali (43), one  
30 from Tigray (44), one from Addis Ababa (45) and two studies involving participants from  
31 different regions (46, 47).  
32  
33  
34  
35

36  
37 Regarding sampling, all of the studies had used the probability sampling technique. The  
38 quality score of each primary study as evaluated based on the JBI quality appraisal criteria  
39 showed no considerable risk; hence, all the studies were included in this systematic review and  
40 meta-analysis (Additional file 1).  
41  
42  
43

### 44 **The pooled prevalence of overweight among adults in Ethiopia**

45  
46 Fourteen studies (n=14) had reported the prevalence of overweight among adults in  
47 different regions of Ethiopia (Additional file 1). The prevalence of overweight reported in the  
48 country ranges from 4.7% (42) to 40.1% (41). The random-effects model analysis from those  
49 studies revealed that in this meta-analysis, the estimated pooled prevalence of overweight among  
50 adults in Ethiopia was 20.44% (95% CI: 16.69, 24.19) with a significant level of heterogeneity  
51 among the studies ( $I^2 = 97.6\%$ ;  $p \leq 0.001$ ) (Fig 2).  
52  
53  
54  
55  
56  
57  
58  
59  
60



## The pooled prevalence of obesity among adults in Ethiopia

Besides overweight, sixteen studies (n=16) had reported the prevalence of obesity among adults in different parts of the country (Additional file 1). The prevalence of obesity reported in the country ranges from 1.6% (42) to 16.2% (34). In this meta-analysis, the estimated pooled prevalence of obesity among adults was 5.44% (95% CI: 4.37, 6.51) but with a significant level of heterogeneity among the studies in the random-effects model analysis ( $I^2 = 93.3\%$ ,  $p \leq 0.001$ ) (Fig 3).

### Subgroup analysis

There was a significant level of heterogeneity among the primary studies included in this systematic review and meta-analysis. Thus, a subgroup analysis was conducted through stratification using study year, residence, study setting, and sample size to identify the sources of heterogeneity for the pooled prevalence of overweight and obesity among adults.

In the subgroup analysis, the prevalence of overweight was found to be 22.55% in studies published since 2015, 22.43% in studies conducted only in urban settings, 20.44% in institution-based settings and 24.39% in studies with a sample size of less than or equal to 384 participants. Similarly, the prevalence of obesity was found to be 6.90% in studies published since 2015, 6.23% in studies conducted only in urban settings, 6.41% in institution-based settings and 9.61% in studies with a sample size of less than or equal to 384 participants (Table 1).

**Table 1:** Prevalence of overweight and obesity in Ethiopia after subgroup analysis by characteristics of the studies included.

| Subgroup             | No. of studies | Overweight (95%CI) | $I^2$ and P-value        | No. of studies | Obesity (95%CI)  | $I^2$ and P-value        |
|----------------------|----------------|--------------------|--------------------------|----------------|------------------|--------------------------|
| <b>Year of study</b> |                |                    |                          |                |                  |                          |
| Before 2015          | 6              | 17.49(12.17,22.81) | (96.5%, $p \leq 0.001$ ) | 7              | 3.74(2.73,4.75)  | (82.3%, $p \leq 0.001$ ) |
| After 2015           | 8              | 22.55(16.57,28.54) | (98.2%, $p \leq 0.001$ ) | 9              | 6.90(4.89,8.92)  | (95.8%, $p \leq 0.001$ ) |
| <b>Residence</b>     |                |                    |                          |                |                  |                          |
| Urban                | 12             | 22.43(17.76,27.10) | (97.4%, $p \leq 0.001$ ) | 14             | 6.23(4.92,7.54)  | (92.6%, $p \leq 0.001$ ) |
| Rural                | -              | -                  | -                        | -              | -                | -                        |
| Both                 | 2              | 10.15(8.70,11.61)  | (60.5%, $p \geq 0.05$ )  | 2              | 1.93(1.54,2.32)  | (0.0%, $p \geq 0.05$ )   |
| <b>Setting</b>       |                |                    |                          |                |                  |                          |
| Community based      | 9              | 19.46(15.93,23.00) | (95.8%, $p \leq 0.001$ ) | 10             | 5.13(3.90,6.35)  | (92.9%, $p \leq 0.001$ ) |
| Institution based    | 5              | 20.44(16.69,24.19) | (98.9%, $p \leq 0.001$ ) | 6              | 6.41(3.79,9.03)  | (94.8%, $p \leq 0.001$ ) |
| <b>Sample size</b>   |                |                    |                          |                |                  |                          |
| <384                 | 4              | 24.39(6.71,42.08)  | (98.7%, $p \leq 0.001$ ) | 5              | 9.61(3.94,15.28) | (94.8%, $p \leq 0.001$ ) |
| >384                 | 10             | 19.34(15.59,23.09) | (97.4%, $p \leq 0.001$ ) | 11             | 4.55(3.54,5.55)  | (92.5%, $p \leq 0.001$ ) |



### **Sensitivity analysis for the prevalence of overweight**

To evaluate the effect of individual studies on the pooled prevalence of overweight among adults in Ethiopia, a sensitivity analysis was performed using the random-effects model. The results from the sensitivity analysis had revealed that a single study had not influenced the pooled estimated prevalence of overweight among adults. The pooled estimated prevalence of overweight varied between 18.92 (15.39, 22.44) (41) and 21.69 (17.89, 25.48) (42) after the deletion of a single study (Fig 4).

### **Sensitivity analysis for the studies included in obesity**

To check the effect of individual studies on the pooled prevalence of obesity in Ethiopia, a sensitivity analysis was performed using the random-effects model and the results had revealed that there was no influential study on the pooled estimated prevalence of obesity among adults. The pooled estimated prevalence of obesity ranged from 4.98 (3.97, 5.99) (41) to 5.83 (4.64, 7.03) (40) after the deletion of a single study (Fig 5).

### **Publication bias**

There was a publication bias among the included studies in both overweight and obesity as illustrated by the asymmetrical distribution of funnel plot tests (Fig 6 and 7). Similarly, the results of Egger's tests for the funnel plot were statistically significant for the presence of publication bias ( $P = 0.002$  for overweight and  $p \leq 0.001$  for obesity) respectively (Fig 8 and 9).

### **Trim and fill analysis for the prevalence of overweight and obesity**

To reduce and adjust the publication bias in the studies, the trim and fill analysis was performed for estimation of the number of missing studies that might exist. During analysis, only one study was imputed for missing studies and after adjustment for publication bias, the estimated pooled prevalence of overweight among adults in Ethiopia appeared to be 19.02 (95% CI: 15.29, 22.74) but with a significant level of heterogeneity among the studies ( $I^2 = 50.29\%$ ;  $p \leq 0.001$ ) (Fig 10).

Likewise, studies included in obesity estimation among adults in Ethiopia were adjusted with trim and fill analysis and only one study was imputed for missing studies. However, after adjustment, the estimated pooled prevalence of obesity was found to be 5.44% (95% CI: 4.37, 6.51). This finding is similar with the unadjusted prevalence rate of obesity, but with different

1  
2 levels of heterogeneity among the studies in the random-effects model analysis ( $I^2 = 3.71\%$ ,  $p \leq$   
3 0.001) (Fig 11).  
4

## 5 6 **Discussion**

7  
8 This systematic review and meta-analysis were conducted to estimate the pooled  
9 prevalence of overweight and obesity among adults in Ethiopia. The prevalence of overweight  
10 reported in the country ranges from 4.7% (42) to 40.1% (41). This difference could be due to  
11 differences in the study population because unlike the first study which was conducted on the  
12 nutritional status of lactating mothers, the second study was conducted among office-based urban  
13 civil servants. Office-based civil servants are one of the highest groups for overweight and  
14 obesity due to their occupational exposure to sedentary type lifestyles (48, 49).  
15  
16  
17  
18  
19  
20

21 Besides, the prevalence of obesity reported in the country ranges from 1.6% (42) to  
22 16.2% (34). This discrepancy might be due to differences in the study population. The first  
23 finding that is 1.6% were reported from the study in lactating mothers and the later, 16.2% was  
24 reported from a study conducted among the general adult population and only in the urban  
25 setting, a well-known risk factor for overweight and obesity because people living in urban  
26 settings are at increased risk of sedentary type lifestyles and consumption of more energy-dense  
27 foods (50, 51). On the other hand, lactating mothers have increased nutritional demand and are at  
28 greater risk of undernutrition if the nutritional requirements are not properly fulfilled (52, 53).  
29  
30  
31  
32  
33  
34  
35

36 In this study, the estimated pooled prevalence of overweight among adults was 20.4%.  
37 However, due to the presence of publication bias, after adjustment with the trim and fill analysis,  
38 the estimated prevalence rate was changed to 19%. Besides, the estimated pooled prevalence of  
39 obesity among adults in Ethiopia was 5.4%. These findings are higher than the 2011 and 2016  
40 Ethiopian demographic and health survey reports indicating an increasing trend in the prevalence  
41 rates of overweight and obesity in Ethiopia (14). The results are in line with a meta-analysis in  
42 the Asian Pacific region which has reported that the prevalence of overnutrition was estimated at  
43 23% (54).  
44  
45  
46  
47  
48  
49

50 A consistent finding has been also reported from a study in Ghana that the national  
51 prevalence of overweight was estimated at 25.4%. However, obesity in the Ghanaian study was  
52 significantly higher (17.1%) than the current study (55). In addition to the Ghanaian study, a  
53 study in Iran has shown that the prevalence of obesity in adults of Iran was 21.4% based on a  
54  
55  
56  
57

1 meta-analysis of studies in the country (56). Another meta-analysis in Iran among military  
2 personnel has also indicated that the pooled prevalence of overweight and obesity was 41% and  
3 13% respectively, significantly higher values than our study findings (57).  
4  
5  
6  
7

8 These discrepancies might be due to differences in the study population, the  
9 developmental level of these countries, and the educational level of participants. One of the  
10 Iranian studies was conducted among military personnel and may not be representative of the  
11 national prevalence of overweight and obesity because the high prevalence rate might be  
12 occupation-related (57). This might be also due to their capacity of purchasing more energy-  
13 dense foods as witnessed from studies in both developed and developing countries that high-  
14 income households purchased foods in bulk and were more likely to over-consume these foods  
15 (58-60).  
16  
17  
18  
19  
20  
21

22 Likewise, the prevalence of overweight and obesity in Ethiopia is significantly lower than  
23 a study in Spain that the estimated prevalence of overweight in the Spanish adult population was  
24 39.3% and obesity was 21.6% (61). The Spanish result is in line with the WHO global report that  
25 39% of adults aged 18 years and over were overweight in 2016, and 13% were obese (7).  
26  
27  
28  
29

30 There was a significant level of heterogeneity among the primary studies included in this  
31 systematic review and meta-analysis. Thus, a subgroup analysis was conducted through  
32 stratification using study year, residence, study setting, and sample size in order to identify the  
33 sources of heterogeneity to the pooled prevalence of overweight and obesity. The prevalence of  
34 overweight was found to be higher in some groups; 22.6% in studies conducted since 2015,  
35 22.4% in studies conducted only in urban settings, 20.4% in institution-based settings and 24.4%  
36 in studies with a sample size of less than or equal to 384 participants compared to their  
37 counterparts. This indicates that overweight has increased among adults in Ethiopia compared to  
38 previous studies (14).  
39  
40  
41  
42  
43  
44  
45

46 Besides, the prevalence of obesity was found to be 6.9% in studies conducted since 2015,  
47 6.2% in studies conducted only in urban settings, 6.4% in institution-based settings, and 9.6% in  
48 studies with a sample size of less than or equal to 384 participants. This means the prevalence of  
49 overweight and obesity is increasing from time to time especially among urban residents.  
50 However, no study was found involving rural participants only. The majority of the studies were  
51 conducted in urban areas and only two studies were conducted involving participants from both  
52  
53  
54  
55  
56  
57

1 urban and rural settings. If sufficient studies were found in rural areas the results might not have  
2 been like this (Table 1).  
3  
4

5  
6 This is due to the fact that the prevalence rate of overweight and obesity is significantly  
7 different in rural and urban settings across low and middle-income countries with the highest  
8 rates occurring in urban settings. For example, the Ghanaian study has reported a higher  
9 prevalence of overweight (27.2% in urban and 16.7% in rural), and obesity (20.6% in urban and  
10 8.0% in rural settings) among urban than rural residents (55). Similar findings have been  
11 reported from the Ethiopian demographic and health survey 2016 report and from other African  
12 countries that the prevalence rate of overweight and obesity is higher among urban residents  
13 compared to the rural residents (14, 17, 62).  
14  
15  
16  
17  
18  
19

20  
21 This finding might be due to the rapid demographic, epidemiologic, and nutrition  
22 transitions in Ethiopia because urbanization and a shift in nutritional habits are the major known  
23 factors which predispose people to overweight and obesity (8). The other reason could be due to  
24 differences in lifestyle of urban dwellers as compared to the rural residents. Unlike rural  
25 residents who are usually more actively involved in a less sedentary lifestyle and more laborious  
26 activities, the occupation of urban dwellers might result in sedentary type lifestyles among the  
27 adult population (63-65).  
28  
29  
30  
31  
32

### 33 **Conclusion**

34  
35  
36 The prevalence rate of overweight and obesity is high in Ethiopia compared with the  
37 previous studies. The prevalence of overweight and obesity was higher in studies conducted only  
38 in urban settings compared with studies conducted in both urban and rural settings. Furthermore,  
39 the rates were also higher in studies conducted since 2015 and in small sample size studies.  
40 Hence, large scale awareness creation campaigns and situation-based and context-specific  
41 preventive strategies need to be designed to reduce the burden of overweight and obesity in the  
42 country.  
43  
44  
45  
46  
47  
48

### 49 **Abbreviations**

50  
51 AOR: Adjusted Odds Ratio; BMI: Body mass index; CI: Confidence Interval; JBI:  
52 Joanna Briggs Institute; SNNPR: Southern Nations, Nationalities, and Peoples Region;  
53 PRISMA: Preferred Reporting Items for Systematic Reviews and Meta-Analyses.  
54  
55  
56  
57

**Declaration****Ethics approval and consent to participate**

Not applicable.

**Consent for publication**

Not applicable.

**Availability of data and materials**

The data used during this systematic review and meta-analysis is available within the article and the supporting file.

**Competing interest**

The authors declare that no competing interests exist.

**Funding**

Not applicable.

**Author's contribution**

AMK and BBA developed the study protocol and were involved in the design, selection of study, data extraction, statistical analysis, and writing the initial drafts of the manuscript. MWK was involved in data extraction, quality assessment, statistical analysis, and revising. AMK and BBA prepared and edited the final manuscript. All authors have read and approved the submission of the final version of the manuscript.

**References**

1. Fanzo J, Hawkes C, Udomkesmalee E, Afshin A, Allemandi L, Assery O, et al. 2018 Global Nutrition Report: Shining a light to spur action on nutrition. 2018.
2. Doak C, Wijnhoven T, Schokker D, Visscher T, Seidell J. Age standardization in mapping adult overweight and obesity trends in the WHO European Region. *Obesity reviews*. 2012;13(2):174-91.
3. World Health Organization (WHO): Global Database on Body Mass Index. BMI Classification [Internet]. Geneva: WHO; 2004 [cited January 14, 2020].
4. Dobbs R, Sawers C, Thompson F, Manyika J, Woetzel J, Child P, et al. Overcoming obesity: An initial economic analysis. 2014. McKinsey & Company: [www.mckinsey.com/mgi](http://www.mckinsey.com/mgi). 2014:1-106.

- 1 5. Morgen CS, Sørensen TI. Obesity: global trends in the prevalence of overweight and  
2 obesity. *Nature Reviews Endocrinology*. 2014;10(9):513.
- 3 6. Tabarés Seisdedos R. Health effects of overweight and obesity in 195 countries over 25  
4 years. *New England Journal of Medicine*, 2017, vol 377, num 1, p 13-27. 2017.
- 5 7. World health organization: Overweight and obesity report fact sheet (accessed, Mar 3,  
6 2020); available from:[https://www.who.int/news-room/fact-sheets/detail/obesity-and-](https://www.who.int/news-room/fact-sheets/detail/obesity-and-overweight)  
7 [overweight](https://www.who.int/news-room/fact-sheets/detail/obesity-and-overweight).
- 8 8. Defo BK. Demographic, epidemiological, and health transitions: are they relevant to  
9 population health patterns in Africa? *Global health action*. 2014;7(1):22443.
- 10 9. Yatsuya H, Li Y, Hilawe EH, Ota A, Wang C, Chiang C, et al. Global trend in  
11 overweight and obesity and its association with cardiovascular disease incidence. *Circulation*  
12 *Journal*. 2014:CJ-14-0850.
- 13 10. Berrington de Gonzalez A, Hartge P, Cerhan JR, Flint AJ, Hannan L, MacInnis RJ, et al.  
14 Body-mass index and mortality among 1.46 million white adults. *New England Journal of*  
15 *Medicine*. 2010;363(23):2211-9.
- 16 11. World Health Organization: Obesity and overweight. Fact sheet number 311. World  
17 Health Organisation. 2014:5-1.
- 18 12. Bovet P, Chiolero A, Gedeon J. Health Effects of Overweight and Obesity in 195  
19 Countries. *The New England journal of medicine*. 2017;377(15):1495-6.
- 20 13. Bhurosy T, Jeewon R. Overweight and obesity epidemic in developing countries: a  
21 problem with diet, physical activity, or socioeconomic status? *The Scientific World Journal*.  
22 2014;2014.
- 23 14. Central Statistical Agency (CSA) [Ethiopia] and ICF International. 2016. Ethiopia  
24 Demographic and Health Survey 2016. Addis  
25 Ababa, Ethiopia, and Rockville, Maryland, USA: CSA and ICF. .
- 26 15. Sarma H, Saquib N, Hasan MM, Saquib J, Rahman AS, Khan JR, et al. Determinants of  
27 overweight or obesity among ever-married adult women in Bangladesh. *BMC obesity*.  
28 2016;3(1):13.
- 29 16. Benkeser R, Biritwum R, Hill A. Prevalence of overweight and obesity and perception of  
30 healthy and desirable body size in urban, Ghanaian women. *Ghana medical journal*.  
31 2012;46(2):66-75.
- 32 17. Diendéré J, Kaboré J, Somé JW, Tougri G, Zeba AN, Tinto H. Prevalence and factors  
33 associated with overweight and obesity among rural and urban women in Burkina Faso. *The Pan*  
34 *African Medical Journal*. 2019;34.
- 35 18. Pengpid S, Peltzer K. Prevalence and correlates of underweight and overweight/obesity  
36 among women in India: results from the National Family Health Survey 2015–2016. *Diabetes,*  
37 *metabolic syndrome and obesity: targets and therapy*. 2019;12:647.
- 38 19. Hruschka DJ, Brewis AA. Absolute wealth and world region strongly predict overweight  
39 among women (ages 18–49) in 360 populations across 36 developing countries. *Economics &*  
40 *Human Biology*. 2013;11(3):337-44.
- 41 20. Bishwajit G. Household wealth status and overweight and obesity among adult women in  
42 Bangladesh and Nepal. *Obesity science & practice*. 2017;3(2):185-92.
- 43 21. Force UPST. Screening and interventions for overweight and obesity in adults. Rockville,  
44 MD: Agency for Healthcare Research and Quality. 2003.
- 45 22. Regassa N, Stoecker BJ. Contextual risk factors for maternal malnutrition in a food-  
46 insecure zone in southern Ethiopia. *Journal of biosocial science*. 2012;44(5):537-48.



23. Ahmed K, Abrha S, Page A, Arora A, Shiferaw S, Tadese F, et al. Trends and Determinants of Underweight and Overweight/Obesity among Urban Ethiopian Women from 2000 to 2016. 2020.
24. World Health Organization (WHO): Global Database on Body Mass Index. BMI Classification [Internet]. Geneva: WHO; 2004 [cited January 14, 2020].
25. Institute JB, Institute JB. Critical appraisal tools. The University of Adelaide See: joannabriggs.org/research/criticalappraisal-tools.html (accessed 20 January 2017). 2017.
26. Huedo-Medina TB, Sánchez-Meca J, Marín-Martínez F, Botella J. Assessing heterogeneity in meta-analysis: Q statistic or I<sup>2</sup> index? *Psychological methods*. 2006;11(2):193.
27. Higgins J, Green S. Assessing risk of bias in included studies. *Cochrane Handbook for Systematic Reviews of Interventions Version 5.1.0*; 2011. 2008.
28. Egger M, Davey-Smith G, Altman D. *Systematic reviews in health care: meta-analysis in context*: John Wiley & Sons; 2008.
29. Shi L, Lin L. The trim-and-fill method for publication bias: practical guidelines and recommendations based on a large database of meta-analyses. *Medicine*. 2019;98(23).
30. StataCorp L. *Stata statistical software (version release 14)*. College Station, TX: Author. 2015.
31. Moher D, Liberati A, Tetzlaff J, Altman DG. Preferred reporting items for systematic reviews and meta-analyses: the PRISMA statement. *Annals of internal medicine*. 2009;151(4):264-9.
32. Awoke A, Awoke T, Alemu S, Megabiaw B. Prevalence and associated factors of hypertension among adults in Gondar, Northwest Ethiopia: a community based cross-sectional study. *BMC cardiovascular disorders*. 2012;12(1):113.
33. Janakiraman B, Abebe SM, Chala MB, Demissie SF. Epidemiology of General, Central Obesity and Associated Cardio-Metabolic Risks Among University Employees, Ethiopia: A Cross-Sectional Study. *Diabetes, Metabolic Syndrome and Obesity: Targets and Therapy*. 2020;13:343.
34. Moges B, Amare B, Fantahun B, Kassu A. High prevalence of overweight, obesity, and hypertension with increased risk to cardiovascular disorders among adults in northwest Ethiopia: a cross sectional study. *BMC cardiovascular disorders*. 2014;14(1):155.
35. Dagne S, Gelaw YA, Abebe Z, Wassie MM. Factors associated with overweight and obesity among adults in northeast Ethiopia: a cross-sectional study. *Diabetes, metabolic syndrome and obesity: targets and therapy*. 2019;12:391.
36. Mekonnen T, Animaw W, Seyum Y. Overweight/obesity among adults in North-Western Ethiopia: a community-based cross sectional study. *Archives of Public Health*. 2018;76(1):18.
37. Amare B, Moges B, Moges F, Fantahun B, Admassu M, Mulu A, et al. Nutritional status and dietary intake of urban residents in Gondar, Northwest Ethiopia. *BMC public health*. 2012;12(1):752.
38. Abera D, Boltana MT. 1. Department of nutrition, Wolaita Sodo University, Ethiopia. 2. Wolaita Sodo University, Health Sciences and Medicine College, School of Public Health.
39. Darebo T, Mesfin A, Gebremedhin S. Prevalence and factors associated with overweight and obesity among adults in Hawassa city, southern Ethiopia: a community based cross-sectional study. *BMC obesity*. 2019;6(1):8.
40. Gutema BT, Chuka A, Kondale M, Ayele G, Kote M, Zerdo Z, et al. The Burden of Malnutrition among Adults Residing in Arba Minch Health and Demographic Surveillance Site (HDSS): A WHO STEPS Survey. *Journal of Nutrition and Metabolism*. 2020;2020.

41. MarkosYohannes. PREVALENCE OF OVERWEIGHT AND OBESITY AMONG OFFICE-BASED URBAN CIVIL SERVANTS IN SOUTHERN NATIONS, NATIONALITIES AND PEOPLES' REGION, ETHIOPIA. *Ethiop Med J*, 2019, Vol. 57, No. 2.
42. Hundera TD, Gemede HF, Wirtu D, Kenie DN. Nutritional status and associated factors among lactating mothers in Nekemte Referral Hospital and Health Centers, Ethiopia. *Int J Nutr Food Sci*. 2015;4(2):216-22.
43. Hussein M. Overs Nitration and Associated Factors Among Women of Reproductive Age Group in Jigjiga Somal, National Regional State Eastern Ethiopia: Haramaya University; 2015.
44. Kahsay AB, Gebru HB, Maeruf H. Prevalence and factors associated with overweight/Obesity in public servants, Tigray, Ethiopia: The case of Mekelle city. *Research & Reviews: Journal of Medical Science and Technology*. 2019;7(3):39-46.
45. Yibeltal T, Charles T, Uriyoan C. The Rising Overweight-obesity and Its Socio-Demographic Correlates in Addis Ababa, Ethiopia, 2000-2011.
46. Mekonnen W, Bogale A. Determinants of Obesity Among Women of Childbearing Age in Urban Areas of Ethiopia. *Age*. 2017;15(19):993.
47. Abrha S, Shiferaw S, Ahmed KY. Overweight and obesity and its socio-demographic correlates among urban Ethiopian women: evidence from the 2011 EDHS. *BMC Public Health*. 2016;16(1):636.
48. Simkhada P, Poobalan A, Simkhada PP, Amalraj R, Aucott L. Knowledge, attitude, and prevalence of overweight and obesity among civil servants in Nepal. *Asia Pacific Journal of Public Health*. 2011;23(4):507-17.
49. Bogale KA, Zewale TA. Determinant factors of overweight/obesity among federal ministry civil servants in Addis Ababa, Ethiopia: a call for sector-wise occupational health program. *BMC research notes*. 2019;12(1):449.
50. Jitnarin N, Kosulwat V, Rojroongwasinkul N, Boonpradern A, Haddock CK, Poston WS. Risk factors for overweight and obesity among Thai adults: results of the National Thai Food Consumption Survey. *Nutrients*. 2010;2(1):60-74.
51. Sola AO, Steven AO, Kayode JA, Olayinka AO. Underweight, overweight and obesity in adults Nigerians living in rural and urban communities of Benue State. *Ann Afr Med* 2011;10:139-143.
52. Neville M. *Lactation: physiology, nutrition, and breast-feeding*: Springer Science & Business Media; 2013.
53. Connor KL, Vickers M, Beltrand J, Meaney M, Sloboda D. Nature, nurture or nutrition? Impact of maternal nutrition on maternal care, offspring development and reproductive function. *The Journal of physiology*. 2012;590(9):2167-80.
54. Peng W, Mu Y, Hu Y, Li B, Raman J, Sui Z. Double Burden of Malnutrition in the Asia-Pacific Region—A Systematic Review and Meta-analysis. *Journal of Epidemiology and Global Health*. 2019.
55. Ofori-Asenso R, Agyeman AA, Laar A, Boateng D. Overweight and obesity epidemic in Ghana—a systematic review and meta-analysis. *BMC Public Health*. 2016;16(1):1239.
56. Vaisi-Raygani A, Mohammadi M, Jalali R, Ghobadi A, Salari N. The prevalence of obesity in older adults in Iran: a systematic review and meta-analysis. *BMC geriatrics*. 2019;19(1):1-9.
57. Salimi Y, Taghdir M, Sepandi M, Zarchi A-AK. The prevalence of overweight and obesity among Iranian military personnel: a systematic review and meta-analysis. *BMC public health*. 2019;19(1):162.
58. McEwen J, Russell E, Stewart S. Needs assessment in Scotland: collaboration in publichealth. *Public health*. 1995;109(3):179-85.



- 1  
2 59. Abdu Z, Kabeta T, Dube L, Tessema W, Abera M. Prevalence and associated factors of  
3 depression among prisoners in Jimma Town Prison, South West Ethiopia. *Psychiatry journal*.  
4 2018;2018.
- 5 60. Kamarulzaman A, Reid SE, Schwitters A, Wiessing L, El-Bassel N, Dolan K, et al.  
6 Prevention of transmission of HIV, hepatitis B virus, hepatitis C virus, and tuberculosis in  
7 prisoners. *The Lancet*. 2016;388(10049):1115-26.
- 8 61. Aranceta-Bartrina J, Pérez-Rodrigo C, Alberdi-Aresti G, Ramos-Carrera N, Lázaro-  
9 Masedo S. Prevalence of general obesity and abdominal obesity in the Spanish adult population  
10 (aged 25–64 years) 2014–2015: the ENPE study. *Revista Española de Cardiología (English*  
11 *Edition)*. 2016;69(6):579-87.
- 12 62. Chukwuonye II, Chuku A, John C, Ohagwu KA, Imoh ME, Isa SE, et al. Prevalence of  
13 overweight and obesity in adult Nigerians—a systematic review. *Diabetes, metabolic syndrome*  
14 *and obesity: targets and therapy*. 2013;6:43.
- 15 63. Chatterji M, Baldwin AM, Prakash R, Vlack SA, Lambert SB. PUBLIC HEALTH  
16 RESPONSE TO A MEASLES OUTBREAK IN A LARGE CORRECTIONAL FACILITY,  
17 QUEENSLAND. *Commun Dis Intell*. 2014;38(4):E294-E7.
- 18 64. Ojiambo RM, Easton C, Casajús JA, Konstabel K, Reilly JJ, Pitsiladis Y. Effect of  
19 urbanization on objectively measured physical activity levels, sedentary time, and indices of  
20 adiposity in Kenyan adolescents. *Journal of physical activity and health*. 2012;9(1):115-23.
- 21 65. Assah FK, Ekelund U, Brage S, Mbanya JC, Wareham NJ. Urbanization, physical  
22 activity, and metabolic health in sub-Saharan Africa. *Diabetes care*. 2011;34(2):491-6.
- 23  
24  
25  
26  
27  
28  
29  
30  
31  
32  
33  
34  
35  
36  
37  
38  
39  
40  
41  
42  
43  
44  
45  
46  
47  
48  
49  
50  
51  
52  
53  
54  
55  
56  
57  
58  
59  
60

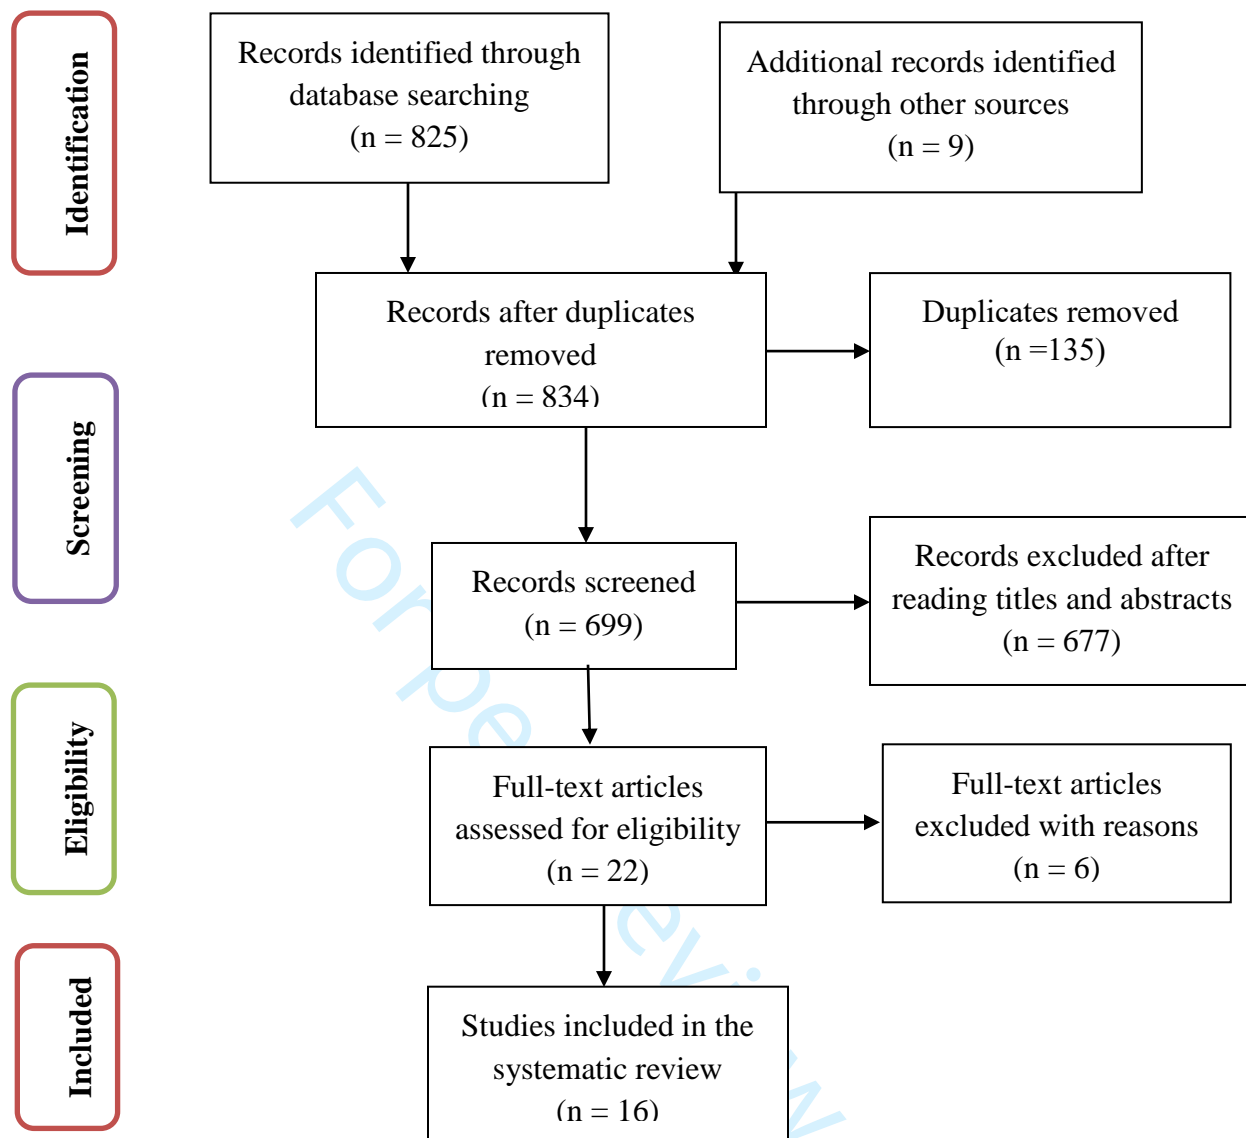

37  
38  
39  
40  
41  
42  
43  
44  
45  
46  
47  
48  
49  
50  
51  
52  
53  
54  
55  
56  
57  
58  
59  
60

**Figure 1:** PRISMA flow chart of study selection for the prevalence of overweight and obesity among adults in Ethiopia.

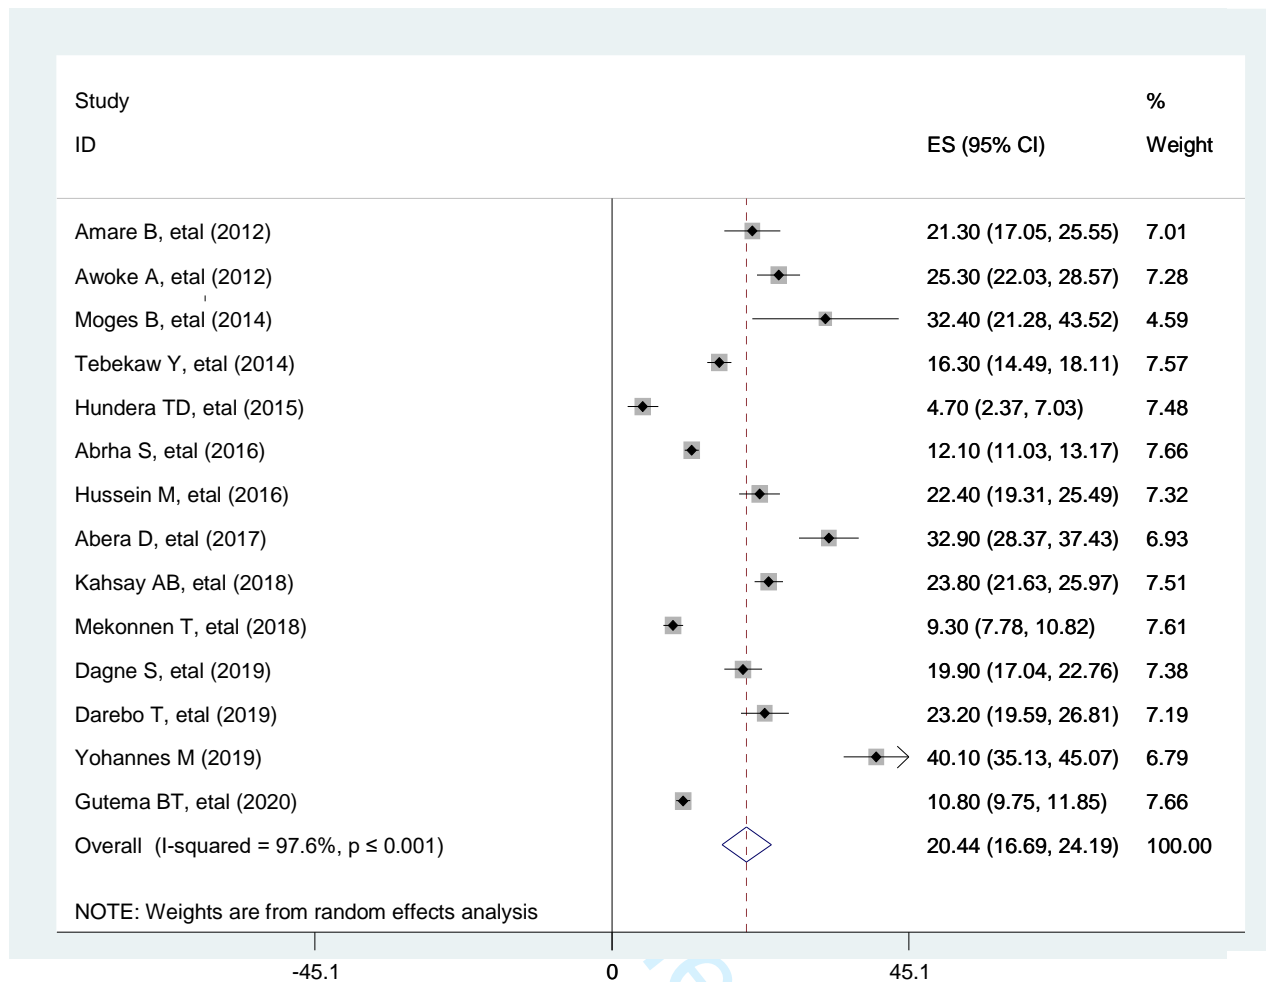

**Figure 2:** Forest plot for the prevalence of overweight among adults in Ethiopia.



| Study omitted    | Coef.     | [95% Conf. | Interval] |
|------------------|-----------|------------|-----------|
| Abera D, etal    | 19.458002 | 15.773933  | 23.142069 |
| Abrha S, etal    | 21.24802  | 16.798456  | 25.697584 |
| Tebekaw Y, etal  | 20.829943 | 16.721661  | 24.938225 |
| Amare B, etal    | 20.375648 | 16.482386  | 24.268913 |
| Awoke A, etal    | 20.031092 | 16.230967  | 23.831217 |
| Dagne S, etal    | 20.491842 | 16.559935  | 24.42375  |
| Darebo T, etal   | 20.217529 | 16.353727  | 24.081333 |
| Gutema BT, etal  | 21.33058  | 17.008682  | 25.652477 |
| Hundera TD, etal | 21.686108 | 17.891603  | 25.480614 |
| Hussein M, etal  | 20.278517 | 16.404625  | 24.152409 |
| Kahsay AB, etal  | 20.123743 | 16.369978  | 23.87751  |
| Mekonnen T, etal | 21.394331 | 17.333912  | 25.45475  |
| Moges B, etal    | 19.859375 | 16.047747  | 23.671003 |
| Yohannes M       | 18.918518 | 15.393227  | 22.443808 |
| Combined         | 20.439183 | 16.689844  | 24.188523 |

**Figure 4:** Result of sensitivity analysis of the 14 studies in the meta-analysis of overweight.

| Study omitted    | Coef.     | [95% Conf. | Interval] |
|------------------|-----------|------------|-----------|
| Abera D, etal    | 5.2844915 | 4.2053108  | 6.3636723 |
| Abrha S, etal    | 5.8013558 | 4.5596724  | 7.0430388 |
| Tebekaw Y, etal  | 5.5626507 | 4.425869   | 6.6994324 |
| Amare B, etal    | 5.4089479 | 4.3111115  | 6.5067844 |
| Awoke A, etal    | 5.4232454 | 4.3210888  | 6.5254025 |
| Dagne S, etal    | 5.156126  | 4.1098514  | 6.2024007 |
| Darebo T, etal   | 5.4749699 | 4.3657789  | 6.5841608 |
| Gutema BT, etal  | 5.832715  | 4.6363239  | 7.0291057 |
| Hundera TD, etal | 5.748404  | 4.6261935  | 6.8706145 |
| Hussein M, etal  | 5.0217872 | 4.0067286  | 6.0368457 |
| Kahsay AB, etal  | 5.6494417 | 4.4939957  | 6.8048878 |
| Mekonnen T, etal | 5.787991  | 4.6217656  | 6.9542165 |
| Moges B, etal    | 5.2873678 | 4.2271786  | 6.3475571 |
| Yohannes M       | 4.9776611 | 3.9654725  | 5.98985   |
| Ahmed KY, etal   | 5.4408903 | 4.3709903  | 6.5107903 |
| Daka DW, etal    | 5.4408903 | 4.3709903  | 6.5107903 |
| Combined         | 5.4408902 | 4.3709902  | 6.5107903 |

**Figure 5:** Result of sensitivity analysis of the 16 studies in the meta-analysis of obesity.

Publication bias for overweight

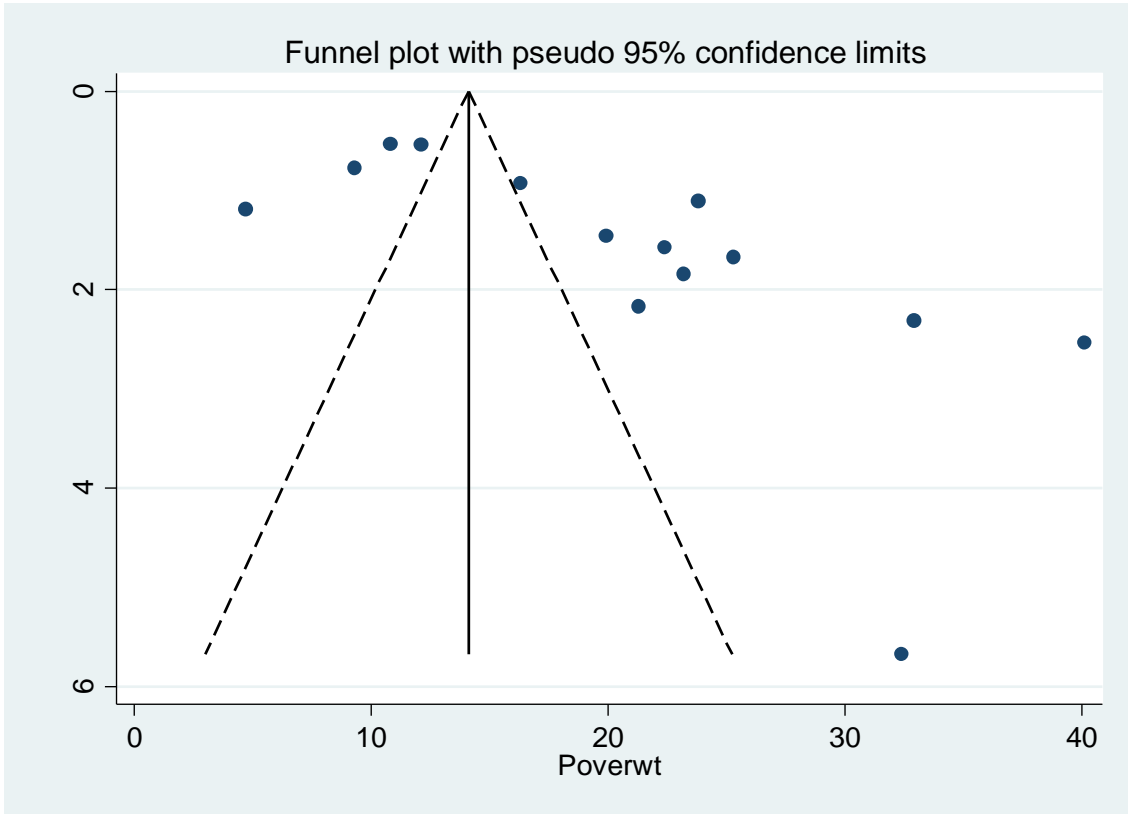

Figure 6: Distribution of studies included in overweight analysis in the Funnel graph.

Publication bias test for obesity

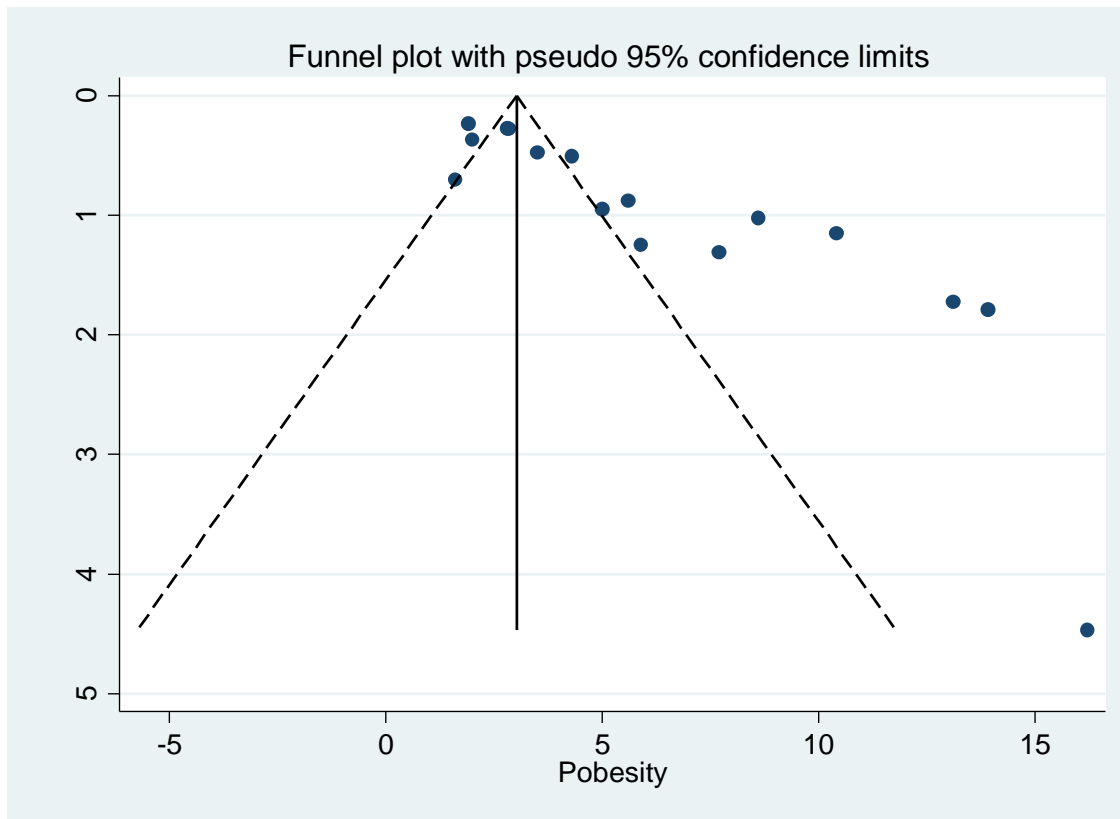

Figure 7: Distribution of studies included in obesity analysis in the Funnel graph.



## Egger's test

| Std_Eff | Coef.    | Std. Err. | t    | P> t  | [95% Conf. Interval] |
|---------|----------|-----------|------|-------|----------------------|
| slope   | 6.137967 | 2.411285  | 2.55 | 0.026 | .8842288 11.39171    |
| bias    | 9.04124  | 2.353041  | 3.84 | 0.002 | 3.914404 14.16808    |

**Figure 8:** Egger's test for detection of publication bias for studies included in overweight.

For peer review only

## Egger's test

| Std_Eff | Coef.    | Std. Err. | t    | P> t  | [95% Conf. Interval] |          |
|---------|----------|-----------|------|-------|----------------------|----------|
| slope   | .8714913 | .4245854  | 2.05 | 0.059 | -.0391538            | 1.782136 |
| bias    | 5.452998 | .8718187  | 6.25 | 0.000 | 3.583133             | 7.322863 |

**Figure 9:** Egger's test for detection of publication bias for studies included in obesity.

For peer review only

### Trim and fill analysis for the pooled prevalence of overweight

#### Meta-analysis

| Method | Pooled Est | 95% CI |        | Asymptotic |         | No. of studies |
|--------|------------|--------|--------|------------|---------|----------------|
|        |            | Lower  | Upper  | z_value    | p_value |                |
| Fixed  | 14.105     | 13.568 | 14.641 | 51.500     | 0.000   | 14             |
| Random | 20.439     | 16.690 | 24.189 | 10.685     | 0.000   |                |

Test for heterogeneity:  $Q = 540.744$  on 13 degrees of freedom ( $p = 0.000$ )  
 Moment-based estimate of between studies variance = 47.477

Trimming estimator: Linear  
 Meta-analysis type: Random-effects model

| iteration | estimate | Tn | # to trim | diff |
|-----------|----------|----|-----------|------|
| 1         | 20.439   | 58 | 1         | 105  |
| 2         | 18.919   | 62 | 1         | 8    |
| 3         | 18.919   | 62 | 1         | 0    |

#### Filled Meta-analysis

| Method | Pooled Est | 95% CI |        | Asymptotic |         | No. of studies |
|--------|------------|--------|--------|------------|---------|----------------|
|        |            | Lower  | Upper  | z_value    | p_value |                |
| Fixed  | 13.916     | 13.382 | 14.449 | 51.106     | 0.000   | 15             |
| Random | 19.016     | 15.289 | 22.743 | 10.000     | 0.000   |                |

Test for heterogeneity:  $Q = 581.975$  on 14 degrees of freedom ( $p = 0.000$ )  
 Moment-based estimate of between studies variance = 50.285

**Figure 10:** Trim and fill analysis for the prevalence of overweight among adults in Ethiopia.

### Trim and fill analysis for the pooled prevalence of obesity

#### Meta-analysis

| Method | Pooled Est | 95% CI Lower | 95% CI Upper | Asymptotic z_value | Asymptotic p_value | No. of studies |
|--------|------------|--------------|--------------|--------------------|--------------------|----------------|
| Fixed  | 3.019      | 2.780        | 3.258        | 24.795             | 0.000              | 16             |
| Random | 5.441      | 4.371        | 6.511        | 9.967              | 0.000              |                |

Test for heterogeneity:  $Q = 223.610$  on 15 degrees of freedom ( $p = 0.000$ )  
 Moment-based estimate of between studies variance = 3.709

Trimming estimator: Linear  
 Meta-analysis type: Random-effects model

| iteration | estimate | Tn | # to trim | diff |
|-----------|----------|----|-----------|------|
| 1         | 5.441    | 77 | 1         | 136  |
| 2         | 5.287    | 79 | 1         | 4    |
| 3         | 5.287    | 79 | 1         | 0    |

#### Filled Meta-analysis

| Method | Pooled Est | 95% CI Lower | 95% CI Upper | Asymptotic z_value | Asymptotic p_value | No. of studies |
|--------|------------|--------------|--------------|--------------------|--------------------|----------------|
| Fixed  | 3.013      | 2.774        | 3.251        | 24.752             | 0.000              | 17             |
| Random | 5.309      | 4.240        | 6.377        | 9.737              | 0.000              |                |

Test for heterogeneity:  $Q = 227.350$  on 16 degrees of freedom ( $p = 0.000$ )  
 Moment-based estimate of between studies variance = 3.754

**Figure 11:** Trim and fill analysis for the prevalence of obesity among adults in Ethiopia.

Additional file 1: Characteristics of included studies in the systematic review and meta-analysis of overweight and obesity among adults in Ethiopia.

| Study | Author               | Year of study | Publication year | Region        | Residence | Setting           | Design          | Sex                  | Sampling Technique               | Sample Size | Class of sample size | Poverwt | Pobesity |
|-------|----------------------|---------------|------------------|---------------|-----------|-------------------|-----------------|----------------------|----------------------------------|-------------|----------------------|---------|----------|
| 1     | Abera D. et al       | After 2015    | 2017             | SNNPR         | Urban     | Institution-based | Cross-sectional | Both male and female | Simple random sampling           | 413         | >384                 | 32.9    | 7.7      |
| 2     | Abriha S. et al      | Before 2015   | 2016             | Not specified | Urban     | Community-based   | Cross-sectional | Only female          | Stratified cluster sampling      | 3602        | >384                 | 12.1    | 2.8      |
| 3     | Tebekaw Y. et al     | Before 2015   | 2014             | Addis Ababa   | Urban     | Community-based   | Cross-sectional | Only female          | Stratified cluster sampling      | 1592        | >384                 | 16.3    | 4.3      |
| 4     | Amare B. et al       | Before 2015   | 2012             | Amhara        | Urban     | Community-based   | Cross-sectional | Both male and female | Simple random sampling           | 356         | <384                 | 21.3    | 5.9      |
| 5     | Awake A. et al       | Before 2015   | 2012             | Amhara        | Urban     | Community-based   | Cross-sectional | Both male and female | Systematic random sampling       | 679         | >384                 | 25.3    | 5.6      |
| 6     | Dagne S. et al       | After 2015    | 2019             | Amhara        | Urban     | Community-based   | Cross-sectional | Both male and female | Multi-stage probability sampling | 751         | >384                 | 19.9    | 8.6      |
| 7     | Darebo T. et al      | After 2015    | 2019             | SNNPR         | Urban     | Community-based   | Cross-sectional | Both male and female | Multistage cluster sampling      | 524         | >384                 | 23.2    | 5        |
| 8     | Gutema BT. et al     | After 2015    | 2020             | SNNPR         | Both      | Community-based   | Cross-sectional | Both male and female | Simple random sampling           | 3,346       | >384                 | 10.8    | 1.9      |
| 9     | Hundera TD. et al    | Before 2015   | 2015             | Oromia        | Urban     | Institution-based | Cross-sectional | Only female          | Probability sampling             | 317         | <384                 | 4.7     | 1.6      |
| 10    | Hussein M. et al     | After 2015    | 2016             | Somali        | Urban     | Community-based   | Cross-sectional | Only female          | Multistage random sampling       | 698         | >384                 | 22.4    | 10.4     |
| 11    | Kahsav AB. et al     | After 2015    | 2018             | Tigray        | Urban     | Institution-based | Cross-sectional | Both male and female | Stratified random sampling       | 1486        | >384                 | 23.8    | 3.5      |
| 12    | Mekonnen T. et al    | After 2015    | 2018             | Amhara        | Both      | Institution-based | Cross-sectional | Only female          | Systematic random sampling       | 1405        | >384                 | 9.3     | 2        |
| 13    | Moges B. et al       | Before 2015   | 2014             | Amhara        | Urban     | Community-based   | Cross-sectional | Both male and female | Simple random sampling           | 68          | <384                 | 32.4    | 16.2     |
| 14    | Yohannes M           | After 2015    | 2019             | SNNPR         | Urban     | Institution-based | Cross-sectional | Both male and female | stratified cluster sampling      | 374         | <384                 | 40.1    | 13.9     |
| 15    | Janakiraman B. et al | After 2015    | 2020             | Amhara        | Urban     | Institution-based | Cross-sectional | Both male and female | Simple random sampling           | 381         | <384                 |         | 13.1     |
| 16    | Mekonnen W. et al    | Before 2015   | 2017             | Not specified | Urban     | Community-based   | Cross-sectional | Only female          | Stratified cluster sampling      | 3535        | >384                 |         | 2.84     |



# PRISMA 2009 Checklist

| Section/topic                      | #  | Checklist item                                                                                                                                                                                                                                                                                              | Reported on page # |
|------------------------------------|----|-------------------------------------------------------------------------------------------------------------------------------------------------------------------------------------------------------------------------------------------------------------------------------------------------------------|--------------------|
| <b>TITLE</b>                       |    |                                                                                                                                                                                                                                                                                                             |                    |
| Title                              | 1  | Identify the report as a systematic review, meta-analysis, or both.                                                                                                                                                                                                                                         | 1                  |
| <b>ABSTRACT</b>                    |    |                                                                                                                                                                                                                                                                                                             |                    |
| Structured summary                 | 2  | Provide a structured summary including, as applicable: background; objectives; data sources; study eligibility criteria, participants, and interventions; study appraisal and synthesis methods; results; limitations; conclusions and implications of key findings; systematic review registration number. | 2                  |
| <b>INTRODUCTION</b>                |    |                                                                                                                                                                                                                                                                                                             |                    |
| Rationale                          | 3  | Describe the rationale for the review in the context of what is already known.                                                                                                                                                                                                                              | 3-4                |
| Objectives                         | 4  | Provide an explicit statement of questions being addressed with reference to participants, interventions, comparisons, outcomes, and study design (PICOS).                                                                                                                                                  | 4                  |
| <b>METHODS</b>                     |    |                                                                                                                                                                                                                                                                                                             |                    |
| Protocol and registration          | 5  | Indicate if a review protocol exists, if and where it can be accessed (e.g., Web address), and, if available, provide registration information including registration number.                                                                                                                               | N/A                |
| Eligibility criteria               | 6  | Specify study characteristics (e.g., PICOS, length of follow-up) and report characteristics (e.g., years considered, language, publication status) used as criteria for eligibility, giving rationale.                                                                                                      | 4-5                |
| Information sources                | 7  | Describe all information sources (e.g., databases with dates of coverage, contact with study authors to identify additional studies) in the search and date last searched.                                                                                                                                  | 3-6                |
| Search                             | 8  | Present full electronic search strategy for at least one database, including any limits used, such that it could be repeated.                                                                                                                                                                               | 4-5                |
| Study selection                    | 9  | State the process for selecting studies (i.e., screening, eligibility, included in systematic review, and, if applicable, included in the meta-analysis).                                                                                                                                                   | 5-7                |
| Data collection process            | 10 | Describe method of data extraction from reports (e.g., piloted forms, independently, in duplicate) and any processes for obtaining and confirming data from investigators.                                                                                                                                  | 5                  |
| Data items                         | 11 | List and define all variables for which data were sought (e.g., PICOS, funding sources) and any assumptions and simplifications made.                                                                                                                                                                       | 3-6                |
| Risk of bias in individual studies | 12 | Describe methods used for assessing risk of bias of individual studies (including specification of whether this was done at the study or outcome level), and how this information is to be used in any data synthesis.                                                                                      | 6                  |
| Summary measures                   | 13 | State the principal summary measures (e.g., risk ratio, difference in means).                                                                                                                                                                                                                               | 8                  |
| Synthesis of results               | 14 | Describe the methods of handling data and combining results of studies, if done, including measures of consistency (e.g., I <sup>2</sup> ) for each meta-analysis.                                                                                                                                          | 8-10               |

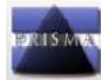

# PRISMA 2009 Checklist

Page 1 of 2

| Section/topic                 | #  | Checklist item                                                                                                                                                                                           | Reported on page # |
|-------------------------------|----|----------------------------------------------------------------------------------------------------------------------------------------------------------------------------------------------------------|--------------------|
| Risk of bias across studies   | 15 | Specify any assessment of risk of bias that may affect the cumulative evidence (e.g., publication bias, selective reporting within studies).                                                             | 12                 |
| Additional analyses           | 16 | Describe methods of additional analyses (e.g., sensitivity or subgroup analyses, meta-regression), if done, indicating which were pre-specified.                                                         | 10-12              |
| <b>RESULTS</b>                |    |                                                                                                                                                                                                          |                    |
| Study selection               | 17 | Give numbers of studies screened, assessed for eligibility, and included in the review, with reasons for exclusions at each stage, ideally with a flow diagram.                                          | 7                  |
| Study characteristics         | 18 | For each study, present characteristics for which data were extracted (e.g., study size, PICOS, follow-up period) and provide the citations.                                                             | 8                  |
| Risk of bias within studies   | 19 | Present data on risk of bias of each study and, if available, any outcome level assessment (see item 12).                                                                                                | 10-12              |
| Results of individual studies | 20 | For all outcomes considered (benefits or harms), present, for each study: (a) simple summary data for each intervention group (b) effect estimates and confidence intervals, ideally with a forest plot. | 9-11               |
| Synthesis of results          | 21 | Present results of each meta-analysis done, including confidence intervals and measures of consistency.                                                                                                  | 9-12               |
| Risk of bias across studies   | 22 | Present results of any assessment of risk of bias across studies (see Item 15).                                                                                                                          | 12                 |
| Additional analysis           | 23 | Give results of additional analyses, if done (e.g., sensitivity or subgroup analyses, meta-regression [see Item 16]).                                                                                    | 10-12              |
| <b>DISCUSSION</b>             |    |                                                                                                                                                                                                          |                    |
| Summary of evidence           | 24 | Summarize the main findings including the strength of evidence for each main outcome; consider their relevance to key groups (e.g., healthcare providers, users, and policy makers).                     | 14-15              |
| Limitations                   | 25 | Discuss limitations at study and outcome level (e.g., risk of bias), and at review-level (e.g., incomplete retrieval of identified research, reporting bias).                                            | 14-16              |
| Conclusions                   | 26 | Provide a general interpretation of the results in the context of other evidence, and implications for future research.                                                                                  | 16                 |
| <b>FUNDING</b>                |    |                                                                                                                                                                                                          |                    |
| Funding                       | 27 | Describe sources of funding for the systematic review and other support (e.g., supply of data); role of funders for the systematic review.                                                               | 16                 |

From: Moher D, Liberati A, Tetzlaff J, Altman DG, The PRISMA Group (2009). Preferred Reporting Items for Systematic Reviews and Meta-Analyses: The PRISMA Statement. PLoS Med 6(7): e1000097. doi:10.1371/journal.pmed1000097

For more information, visit: [www.prisma-statement.org](http://www.prisma-statement.org).

Page 2 of 2  
For peer review only - <http://bmjopen.bmj.com/site/about/guidelines.xhtml>
