# Supplementary material for: Prevalence of overweight/obesity among the adult population in Ethiopia: a systematic review and meta-analysis
Source: PubMed Central journal article supplement — BMJ Open. 2020 Aug 6;10(8):e039200. doi: 10.1136/bmjopen-2020-039200 (PMC7412611; doi:10.1136/bmjopen-2020-039200), 2020-08-06
Supplement: bmjopen-2020-039200supp001.pdf [file bmjopen-2020-039200supp001.pdf]

Additional file 1: Characteristics of included studies in the systematic review and meta-analysis of overweight and obesity among adults in Ethiopia.

| Study | Author              | Yearofstudy | Publicationyear | Region        | Residence | Setting           | Design          | Sex                  | SamplingTechnique                | SampleSize | Classofsamplesize | Poverwt | Pobesity |
|-------|---------------------|-------------|-----------------|---------------|-----------|-------------------|-----------------|----------------------|----------------------------------|------------|-------------------|---------|----------|
| 1     | Abera D, etal       | After 2015  | 2017            | SNNPR         | Urban     | Institution-based | Cross-sectional | Both male and female | Simple random sampling           | 413        | >384              | 32.9    | 7.7      |
| 2     | Abriha S, etal      | Before 2015 | 2016            | Not specified | Urban     | Community-based   | Cross-sectional | Only female          | Stratified cluster sampling      | 3602       | >384              | 12.1    | 2.8      |
| 3     | Tebekaw Y, etal     | Before 2015 | 2014            | Adulis Ababa  | Urban     | Community-based   | Cross-sectional | Only female          | Stratified cluster sampling      | 1592       | >384              | 16.3    | 4.3      |
| 4     | Amare B, etal       | Before 2015 | 2012            | Ambara        | Urban     | Community-based   | Cross-sectional | Both male and female | Simple random sampling           | 356        | <384              | 21.3    | 5.9      |
| 5     | Awoke A, etal       | Before 2015 | 2012            | Ambara        | Urban     | Community-based   | Cross-sectional | Both male and female | Systematic random sampling       | 679        | >384              | 25.3    | 5.6      |
| 6     | Dagne S, etal       | After 2015  | 2019            | Ambara        | Urban     | Community-based   | Cross-sectional | Both male and female | Multi-stage probability sampling | 751        | >384              | 19.9    | 8.6      |
| 7     | Darebo T, etal      | After 2015  | 2019            | SNNPR         | Urban     | Community-based   | Cross-sectional | Both male and female | Multi-stage cluster sampling     | 524        | >384              | 23.2    | 5        |
| 8     | Gutema BT, etal     | After 2015  | 2020            | SNNPR         | Both      | Community-based   | Cross-sectional | Both male and female | Simple random sampling           | 3,346      | >384              | 10.8    | 1.9      |
| 9     | Hundera TD, etal    | Before 2015 | 2015            | Oromia        | Urban     | Institution-based | Cross-sectional | Only female          | Probability sampling             | 317        | <384              | 4.7     | 1.6      |
| 10    | Hassen M, etal      | After 2015  | 2016            | Somali        | Urban     | Community-based   | Cross-sectional | Only female          | Multi-stage random sampling      | 698        | >384              | 22.4    | 10.4     |
| 11    | Kahsay AB, etal     | After 2015  | 2018            | Tigray        | Urban     | Institution-based | Cross-sectional | Both male and female | Stratified random sampling       | 1486       | >384              | 23.8    | 3.5      |
| 12    | Mekonnen T, etal    | After 2015  | 2018            | Ambara        | Both      | Institution-based | Cross-sectional | Only female          | Systematic random sampling       | 1405       | >384              | 9.3     | 2        |
| 13    | Moges B, etal       | Before 2015 | 2014            | Ambara        | Urban     | Community-based   | Cross-sectional | Both male and female | Simple random sampling           | 68         | <384              | 32.4    | 16.2     |
| 14    | Yohannes M          | After 2015  | 2019            | SNNPR         | Urban     | Institution-based | Cross-sectional | Both male and female | stratified cluster sampling      | 374        | <384              | 40.1    | 13.9     |
| 15    | Janakiraman B, etal | After 2015  | 2020            | Ambara        | Urban     | Institution-based | Cross-sectional | Both male and female | Simple random sampling           | 381        | <384              |         | 13.1     |
| 16    | Mekonnen W, etal    | Before 2015 | 2017            | Not specified | Urban     | Community-based   | Cross-sectional | Only female          | Stratified cluster sampling      | 3535       | >384              |         | 2.84     |
